# 1            **Increased upper-limb sensory attenuation with age**

2            Manasa Parthasharathy <sup>[1,2]</sup>, Dante Mantini <sup>[1-3]</sup>±, Jean-Jacques Orban de Xivry <sup>[1,2]</sup>± \*

3            <sup>[1]</sup> Motor Control and Neuroplasticity Research group, Department of Movement Sciences, KU  
4            Leuven, 3001, Leuven, Belgium

5            <sup>[2]</sup> Leuven Brain Institute, KU Leuven, 3001, Leuven, Belgium

6            <sup>[3]</sup> Brain Imaging and Neural Dynamics Research Group, IRCCS San Camillo Hospital, 30126,  
7            Venice, Italy.

8            ± These two authors equally contributed to the paper.

9            \* Correspondence: J.J Orban de Xivry, [jj.orban@kuleuven.be](mailto:jj.orban@kuleuven.be). Tervuursevest 101 - bus 1501  
10            3001 Leuven

11

12

13

## 14    **Acknowledgements**

15    This work was supported by an internal grant of the KU Leuven (STG/14/054) and by the FWO  
16    (Hercules I005018N). We thank Remie De Crock, Olivier De Weer and Astrid Mulier for  
17    helping us with the data collection

## 18 Abstract

19 The pressure of our own finger on the arm feels differently than the same pressure exerted by  
20 an external agent: the latter involves just touch, whereas the former involves a combination of  
21 touch and predictive output from the internal model of the body. This internal model predicts  
22 the movement of our own finger and hence the intensity of the sensation of the finger press is  
23 decreased. A decrease in intensity of the self-produced stimulus is called sensory attenuation.  
24 It has been reported that, due to decreased somatosensation with age and an increased reliance  
25 on the prediction of the internal model, sensory attenuation is increased in older adults.

26 In this study, we used a force-matching paradigm to test if sensory attenuation is also present  
27 over the arm and if aging increases sensory attenuation. We demonstrated that, while both  
28 young and older adults overestimate a self-produced force, older adults overestimate it even  
29 more showing an increased sensory attenuation. In addition, we also found that both younger  
30 and older adults self-produce higher forces when activating the homologous muscles of the  
31 upper limb.

32 While this is traditionally viewed as evidence for an increased reliance on internal model  
33 function in older adults because of decreased somatosensory function, somatosensation  
34 appeared unimpaired in our older participants. This begs the question of whether the decreased  
35 somatosensation is really responsible for the increased sensory attenuation observed in older  
36 people.

## 37 New and Noteworthy

38 Forces generated externally (by the environment on the participant) and internally (by the  
39 participant on her/his body) are not perceived with the same intensity. Internally-generated  
40 forces are perceived less intensely than externally generated ones. This difference in force  
41 sensation has been shown to be higher in elderly participants when the forces were applied on  
42 the fingers because of their impaired somatosensation. Here we replicated this finding for the  
43 arm but suggest that it is unlikely linked to impaired somatosensory function.

44

## 45 Introduction

46 The position of one's arm is monitored by sensory organs such as skin receptors or muscle  
47 proprioceptors. This information is then processed in light of a top-down organization where  
48 expectations and prior knowledge influence how the stimulus is perceived (Kok et al. 2012; de  
49 Lange et al. 2018). In essence, sensorimotor integration is a process in which the central nervous  
50 system integrates different sources of information (sensory and prior information) and  
51 transform them into motor actions (Machado et al. 2010). This processing allows humans to  
52 differentiate between internal (produced by our own movement) and external stimuli  
53 (Blakemore et al., 1998). As a result, our body perceives the sensory consequences of its own  
54 movements less intensely than the same stimulus produced by the external environment. This  
55 decrease in intensity of the perception of the self-produced stimuli is called sensory attenuation  
56 (Blakemore et al. 2000; Brown et al. 2013; Wolpert et al. 1995a) and relies on the connection  
57 between sensorimotor areas and the cerebellum (Kilteni and Henrik Ehrsson 2020).

58 Sensory attenuation (also termed sensory cancellation) is a widespread phenomenon that  
59 applies to different types of movements (saccades, vestibuloocular reflex, force, etc.), to  
60 perception (Cao et al. 2017; Klever et al. 2019; Niziolek et al. 2013) and is observed in many  
61 species (Sillar and Roberts 1988; Webb 2004). For instance, there is evidence of attenuation of  
62 responses to self-generated sounds in mice (Rummell et al. 2016). Flying insects need to be  
63 able to distinguish self-induced stimulation (such as rotation of the visual field caused by  
64 tracking a target) from externally imposed stimulation (such as visual rotation due to air  
65 disturbances) if they are to use the latter for flight stabilization (Dickinson and Muijres 2016;  
66 Webb 2004). Electric fish need to distinguish between perturbation of the surrounding electric  
67 field is due to a predator or due to their own movements (Kirk 1985). Sensory attenuation might  
68 also explain why humans cannot tickle themselves (Blakemore et al. 2000; Wolpert et al.  
69 1995b), and why sounds produced by an external agent always seem louder than sounds  
70 produced by us (Klaffehn et al. 2019).

71 Another consequence of sensory attenuation is the tendency to underestimate the force that  
72 individuals produce in force matching tasks (Palmer et al. 2016; Shergill et al. 2003; Wolpe et  
73 al. 2016). In such tasks, participants are asked to reproduce an external force with one hand  
74 applied on the other hand (target force, e.g. 2N). They typically produce more force that they  
75 should (self-produce force, e.g. 3N) while judging that the target and the self-produced forces  
76 have the same intensity. This phenomenon is referred to as over-compensation and is a  
77 behavioral consequence of sensory attenuation.

78 To capture the causal relationships between our actions and their sensory consequences, the  
79 brain makes use of an internal forward model (Blakemore et al. 2000; Franklin and Wolpert  
80 2011; Shadmehr et al. 2010; Sommer and Wurtz 2008; Wolpert et al. 1995a; Wolpert and Miall  
81 1996). Such internal model takes a copy of the motor commands sent to the muscles (efference  
82 copy or corollary discharge) as input and outputs the predicted sensory consequences. When a  
83 sensation is internally generated (e.g. by our own movement), the internal model predicts its  
84 sensory consequences (Blakemore et al. 2000; Bubic et al. 2010; Cullen et al. 2011; Wolpert et  
85 al. 1995a) and uses this prediction to attenuate the sensory effects of the produced movement  
86 (Blakemore et al. 2000; Sato 2008; Wolpert et al. 1995). Externally generated sensations are  
87 not associated with any efference copy and are therefore perceived differently.

88 By attenuating the sensory consequences that are due to self-produced movement it is possible  
89 to accentuate the sensation of events caused by external agents (Moore et al. 2009). Sensory  
90 attenuation has been linked to the sense of agency, which is the perception that the observed  
91 movement has been internally generated (Kilteni and Ehrsson 2017; Moore et al. 2009). It is  
92 based on the comparison between the expected sensory consequences of the movement and the  
93 actual sensations of it (Brown et al. 2013; Moore et al. 2009; Weiss et al. 2011). If these match,  
94 the movement will be considered as internally-generated. A sense of agency over movements  
95 that generate sensation seems to be necessary for sensory attenuation; sensory attenuation does  
96 not occur if the movement and sensation are correlated, but the relationship is not perceived as  
97 causal (Brown et al. 2013; Desantis et al. 2012; Gentsch and Schütz-Bosbach 2011) .

98 Studies have shown that sensory attenuation increases with age (Klever et al. 2019; Wolpe et  
99 al. 2016). For instance, in force matching tasks, when young and old participants experience an  
100 external force on their finger, older participants applied higher self-produced forces than  
101 younger participants. This increased overcompensation with aging might stem from age-related  
102 changes in one of the two sources of information used for sensory attenuation: sensory feedback  
103 or internal model predictions. Furthermore, the balance between these two streams of  
104 information has been shown to rely on Bayesian integration (Ernst and Banks 2002). That is,  
105 both streams are weighted in function of their relative reliability (Körding et al. 2004; Orban de  
106 Xivry et al. 2013). Given that the reliability of sensory information decreases with aging (Dunn  
107 et al. 2015; Goble et al. 2009; Ranganathan et al. 2001), it has been suggested that older adults  
108 rely more on the predictive stream (i.e. on their internal model) (Wolpe et al. 2016). In addition,  
109 some studies point to the fact that internal model function might be not be affected by aging  
110 (Heuer et al. 2011; Vandevoorde and Orban de Xivry 2019), but this is still debated (Bernard  
111 and Seidler 2014).

112 To our knowledge, the only two studies that evaluated age-related changes in the motor domain  
113 did so at the fingers (Klever et al. 2019; Wolpe et al. 2016). Yet, sensory attenuation has been  
114 reported for upper limbs as well (Logan et al. 2019). In this study, we want to investigate  
115 whether a larger sensory attenuation in older participants can be detected in other limbs and  
116 decided to focus on the upper limbs. We hypothesized that older adults will have a higher  
117 sensory attenuation over the arm due to increased reliance on internal models. In addition, we  
118 tested the possibility that sensory attenuation is modulated by the group of muscles sensing and  
119 producing the force. To do so, we compared the amount of overcompensation when  
120 homologous or non-homologous muscles are involved in sensing and producing the forces as  
121 network controlling homologous muscles have a particular connection as evidenced by  
122 mirroring activity during unilateral movements (Beaulé et al. 2012). We hypothesized that this  
123 connection would increase with age (Shinohara et al. 2003), hence we examined it in both  
124 young and older adults.

## 125 **Methods:**

126 Thirty-five young adults aged 18-35 years and thirty-five older adults aged 55-75 years,  
127 participated in experiment 1. Thirty-one young adults aged 18-35 years and thirty older adults  
128 aged 53-75 years participated in experiment 2. Both experiments were approved by the Ethics  
129 Committee of the University Research UZ/KU Leuven (Study number: S61179) and performed  
130 according to the guidelines of the Declaration of Helsinki. All subjects provided their written  
131 consent prior to their participation. The Edinburgh handedness questionnaire (Oldfield 1971)  
132 was used to confirm self-reported right-handedness. All participants were screened with a  
133 general health and consumption habits questionnaire. None of them reported a history of  
134 neurological disease. Older adults were assessed using the Mini-Mental State Examination  
135 (Folstein et al. 1975) for general cognitive functions. All older adults scored within normal  
136 limits (score  $\geq$  26).

## 137 **Setup**

138 Participants were asked to grab the handles of a robotic manipulandum (KINARM End-Point  
139 Labs™, BKIN Technologies, Kingston, ON Canada). Their hands were hidden from view and  
140 reflected as two white cursors. These cursors were displayed on a screen placed tangentially  
141 above a mirror and were reflected by it. Because the mirror was halfway between the handle  
142 and the screen, the cursors appeared to be positioned at the same position in space as the hands.  
143 All experimental conditions were programmed in MATLAB-Simulink (Mathworks, Natick,  
144 MA, US). The force exerted on the handles were measured by built-in force transducers.  
145 Position and force data were sampled at 1000 Hz.

## 146 Experimental paradigm

147 The Force Matching task implements the Method of Adjustment, in which participants adjust  
148 the level of the stimulus to match a previously presented stimulus (Wolpe et al., 2016). Two  
149 red circles appeared on the screen and participants had to reach to them and to maintain their  
150 hand position inside them. The color of the circles turned green to indicate that the hand cursors  
151 were positioned inside them. The right handle was then locked at that position in order to  
152 eliminate movements of the right handle throughout the experiment. The left circle turned then  
153 blue to indicate the start of force perception period. During the force perception period, the left  
154 hand was pushed rightwards (+X direction) by the robot with a force of 4, 6 or 8N (target force).  
155 The force was ramped up over 1s, maintained constant during 2s and then ramped down during  
156 1 second. Participants were asked to resist the force and stay inside the circle. A safety region  
157 was included between the two hands. If participants did not resist the force enough and if, as a  
158 consequence, the left hand went above half the distance between the two targets (i.e. between  
159 the original positions of the left and right hands), the force was turned off and the trial was  
160 restarted. Three target forces of 4, 6 and 8 N were presented in pseudorandom order. Ten trials  
161 were provided for each level of force.

162 At the end of this phase, the right circle (above the right hand) turned blue to indicate the start  
163 of force reproduction period. In this phase, the participants had to control the robot in order to  
164 produce a force on the left hand that matched the force experienced during the force perception  
165 period. The reproduction phase differed in function of the condition.

166 In the slider condition, the right circle became a rectangular shape of 20 cm of height and 2 cm  
167 of length. Participants could produce force on the left hand by moving the dot located within  
168 the rectangle up (slider up) or down (slider down). The position on the slider was mapped to  
169 the force on the left handle (Fig 1A 2a. Slider). In experiment 1, subjects were given a maximum  
170 of 6 seconds to match the perceived force and were asked to apply the matched force until the  
171 end of the reproduction phase. In experiment 2, they had unlimited time but had to signal  
172 verbally to the experimenter when they had matched the target force. The experimenter ended  
173 then the reproduction phase by clicking on a button.

174 The slider condition was designed to estimate somatosensation and evaluate sensory biases in  
175 the force-matching task as the movement of the right hand was only indirectly matched to the  
176 force produced on the left hand. In contrast, there were two conditions where the force exerted  
177 by the right hand was directly mapped to the force felt in the left hand.

178 In the mirror condition, participants had to match the target force by exerting a force with the  
179 right hand on the right handle, in the  $-X$  direction. This produced force was transmitted to and  
180 felt on the left handle in the  $+X$  direction. In experiment 1, subjects were given a maximum of  
181 6 seconds to match the target force and were asked to apply the matched force until the end of  
182 the reproduction phase. In experiment 2, they had unlimited time but had to signal verbally to  
183 the experimenter that they had matched the target force. The experimenter ended then the  
184 reproduction phase by clicking on a button. This condition required the activation of non-  
185 homologous muscles of the arm (biceps for the right arm to produce the force and triceps for  
186 the left arm to resist the force). The objective of this condition was to test if activation of non-  
187 homologous muscles of both arms had an effect on the perception of self-produced forces.

188 The direct parallel condition differed from the mirror condition in the mapping between the  
189 force produced on the right hand and the force felt in the left hand and in the instructions. In  
190 the parallel condition, the produced and felt forces were in the same direction. That is, if the  
191 right hand produced a force in the  $-X$  direction, the force produced on the left hand was also in  
192 the  $-X$  direction (Fig 1A 2c. Parallel). Furthermore, while the target force was felt in the  $+X$   
193 direction, the participants were instructed to match the force in the  $-X$  direction. This condition  
194 was only used in experiment 1. The parallel condition requires the activation of homologous  
195 muscles of the arm.

196 The direct and slider conditions were counterbalanced across participants for both experiments.  
197 In experiment 1, the order of the mirror and parallel conditions was also randomized.

198 Before experiment 1, participants were given 9 practice trials, in each condition. In experiment  
199 2, we programmed further instructions for each stage of the task on the screen for participants  
200 and increased the number of training blocks. First, there was a practice block where participants  
201 only felt the target forces. Next, a “play” block was provided where participants could apply  
202 the force on the right handle and feel it on the left one. The third block was a practice block that  
203 involved all stages of the task.

204 In both experiments, subjects were also ensured breaks in between conditions and blocks in  
205 order to prevent fatigue.

## 206 **The position matching task.**

207 To assess proprioceptive abilities, we also tested  $N=69$  (34 young and 35 old, experiment 1)  
208 and  $N=56$  (30 young and 26 old, experiment 2) subjects on an arm position matching task  
209 (Dukelow et al. 2010; Fuentes and Bastian 2010). Subjects were instructed to relax and let the  
210 robot move the right arm to 1 of 9 different spatial locations. When the robot stopped moving,

211 subjects were asked to move their left hand to the mirror location in space i.e mirror-match the  
212 position of the robot. Subjects notified the examiner when they completed each trial and the  
213 examiner then triggered the next trial. Target locations were randomized within a block. Each  
214 subject completed 6 blocks for a total of 54 trials.

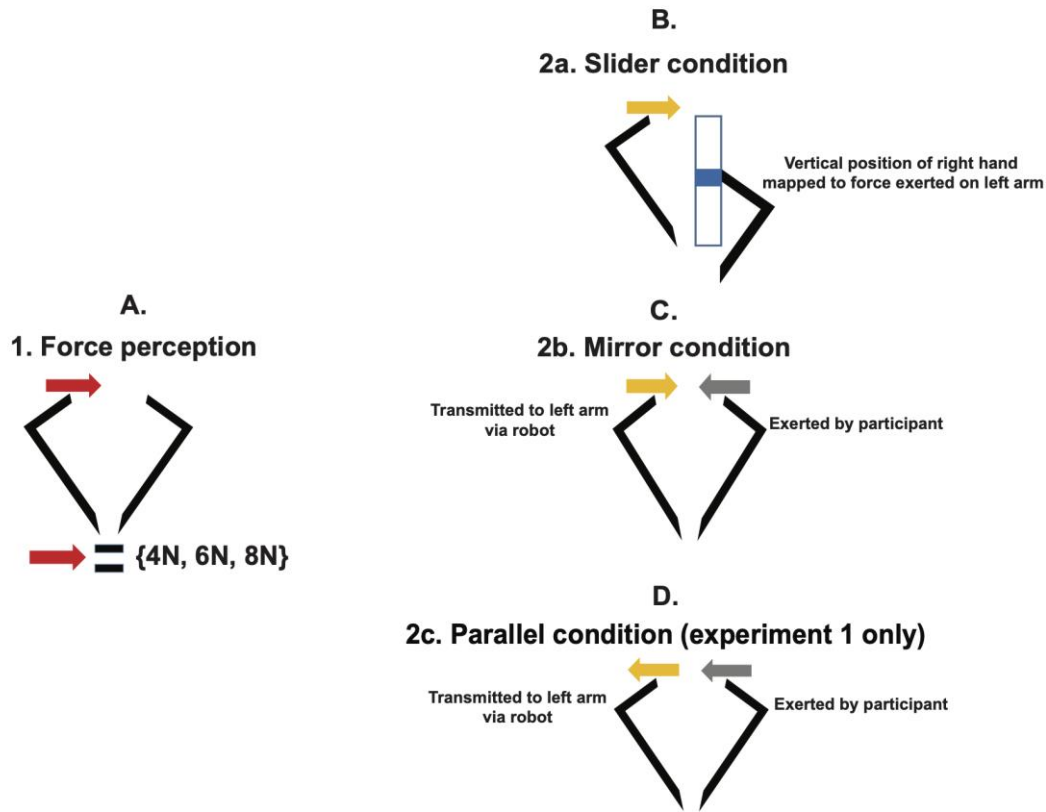

215

216 **Fig 1: Experimental blocks of the study.** Panel A: A target force that pushed the left arm to the +X direction was  
217 presented for 2 seconds (force perception phase), with a ramp-up and ramp-down of 1 second each. Participants  
218 were asked to counteract this force and judge the level. The force perception phase was followed by a second  
219 phase (force reproduction phase) where the participants were asked to reproduce the force that they perceived  
220 on their left hand. This phase differed across the three possible experimental conditions (panels B, C and D). In the  
221 slider condition (panel B), participants matched the target force by moving the right arm up or down on a slider.  
222 The position of the hand/slider was mapped to a certain level of force and transmitted to and felt on the left arm.  
223 There were also two direct Conditions: Mirror (panel C) and Parallel (panel D). In the mirror condition (panel  
224 C), participants matched the target force by applying a force to the right handle using the right arm. This was  
225 transmitted and felt on the left arm in the +X direction as shown by the arrows. In the parallel condition (panel  
226 D), participants matched the target force by applying a force to the right handle using the right arm. This was  
227 transmitted and felt on the left arm in the -X direction as shown by the arrows.

## 228 Data processing

229 All the data collected were analyzed in MATLAB (Mathworks, Natick, MA, US). For  
230 experiment 1, produced forces were calculated as the average of the force measured by the force  
231 transducer of the left handle (which is very similar to the force produced by the participant on  
232 the right handle in direct conditions) between 1s and 3s after the start of matching phase (Fig  
233 2). For experiment 2, the produced forces were calculated between 1s after the start matching



234 phase and until the verbal cue of the participant when the Go button was pressed. Target forces  
235 were taken as 4, 6 and 8 N which were same as the commanded forces from the robot. Since  
236 the subject resisted the forces, the actual forces perceived during the force perception were very  
237 slightly higher or lower than the target forces of 4, 6 and 8 N.

238 For each trial separately, we computed the force error as the difference between the produced  
239 force and the target force. This quantity was expressed in Newton. We then computed the  
240 normalized overcompensation as the difference in force error between the direction condition  
241 (mirror or parallel) and the slider condition. In other words, we used the slider condition as the  
242 control condition.

## 243 Data Analysis

244 All values (calculated average force and force error values used in our statistical analyses) were  
245 those averaged across valid trials. Trials where the forces were not resisted enough and where  
246 the hand went into the safety region were excluded. We rejected 6.7 % of trials in the slider  
247 condition and 3% in the direction conditions for experiment 1. In experiment 2, these  
248 percentages amounted to 6.8% and 1.3%, respectively.

249 All analyses were performed in Matlab (Mathworks, Natick, MA, US). For slider conditions,  
250 we calculated the average between the slider up and slider down trials. In experiment 1, there  
251 was no slider down condition for one older subject. In experiment 2, there was no slider down  
252 condition for 12 older subjects.

253 In the paper, we report the mean (across trials) of the average force value from each trial. In the  
254 supplementary material, we also report the median (across trials) of the average force values  
255 from each trial (supplementary note 1) and the mean (across trials) of the maximum force value  
256 from each trial (supplementary note 2) for each participant, condition and experiment.

### 257 Analysis 1:

258 To test for differences between the two age groups across all three force levels in experiment  
259 1, we used a 2-way analysis of variance (ANOVA) with force errors as the dependent variable,  
260 age group as the between-subject factor and levels of forces (4, 6 and 8N) as within-subject  
261 factor. We performed this test for each condition (slider, parallel, mirror) separately.

### 262 Analysis 2:

263 To test for difference in performance between age groups across all three force levels and all  
264 three conditions for experiment 1, we used a 2-way analysis of variance (ANOVA) with the  
265 three levels of forces and three conditions (slider, mirror and parallel) as within-subject factors.  
266 We performed this test separately for young and older adults

267 **Analysis 3:**

268 To test for differences between the two age groups across all three force levels and all three  
269 conditions in experiment 1, we used a 3-way analysis of variance (ANOVA) with the age as the  
270 between-subject factor and levels of forces and conditions as within-subject factor, with the  
271 force level as the dependent variable.

272 **Analysis 4:**

273 To test for differences between the normalized overcompensation in the two age groups across  
274 all three force levels and all three conditions in experiment 1, we used a 3-way analysis of  
275 variance (ANOVA) with the age as the between-subject factor and levels of forces and  
276 conditions (mirror vs. parallel) as within-subject factor. We also performed a t-test against zero  
277 for each condition (mirror and parallel) to test whether mean normalized overcompensation was  
278 higher or lower than zero. We performed the t-test separately in young and older adults.

279 **Analysis 5:**

280 To test for differences between the two age groups across all three force levels in experiment  
281 2, we used a 2-way analysis of variance (ANOVA) with the age group as the between-subject  
282 factor and levels of forces as within-subject factor. We performed the same test for each  
283 condition.

284 **Analysis 6:**

285 To test for difference in performance between each age groups across all three force levels and  
286 all three conditions for experiment 2, we used a 2-way analysis of variance (ANOVA) with the  
287 three levels of forces and two conditions as within-subject factors. We performed this test for  
288 young and old adults separately.

289 **Analysis 7:**

290 To test for differences between the two age groups across all three force levels and both  
291 conditions in experiment 2, we used a 3-way analysis of variance (ANOVA) with age group as  
292 the between-subject factor and levels of forces and conditions as within-subject factor.

293 **Analysis 8:**

294 To test for differences between the normalized overcompensation in the two age groups across  
295 the mirror condition in experiment 2, we used a 1-way analysis of variance (ANOVA) with the  
296 age as the between-subject factor.

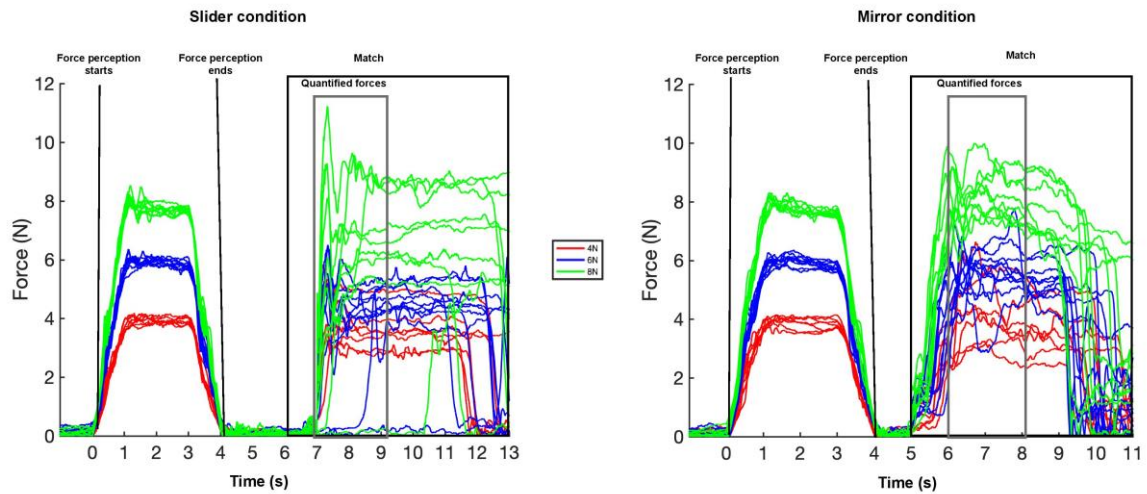

297

298 *Fig 2. Force profile of one participant across all three levels of force and two conditions. The force profile is*  
299 *represented for all trials from one participant across two different conditions (left panel: slider; right panel:*  
300 *mirror). Each color corresponds to a different target force (4, 6 or 8 N) that was presented to the participant*  
301 *during the force perception phase. The X-axis represents the number of seconds since the start of the force*  
302 *perception period. The Y-axis shows the force measured by the force transducer of the left hand.*

## 303 Results

304 In the force-matching task, participants had to reproduce with their right arm a target force that  
305 they perceived earlier with their left arm. During the force perception period, participants  
306 experienced the target force for 2 seconds, with a force ramp up and ramp down for 1 second  
307 while trying to maintain their hand in a given position (Fig.2). During the force reproduction  
308 period, they exerted a force against the right handle of the robotic manipulandum, which was  
309 transmitted and felt on the left arm (direct condition). As shown in Fig.2 for one participant, the  
310 produced forces were generally higher than the target forces in most of the trials. In addition,  
311 this was observed across all levels of forces (Fig 2, red, blue and green lines). The level of  
312 produced force in the direct condition was compared to the control condition where the action  
313 of the right arm was indirectly linked to the force transmitted to the left arm. In the slider  
314 condition (Fig 2, left panel), participants produced the force with their right arm by moving the  
315 right handle up or down like a slider. In the direct condition (Fig 2, right panel), the produced  
316 force corresponded to the force that the participant exerted on the right handle.

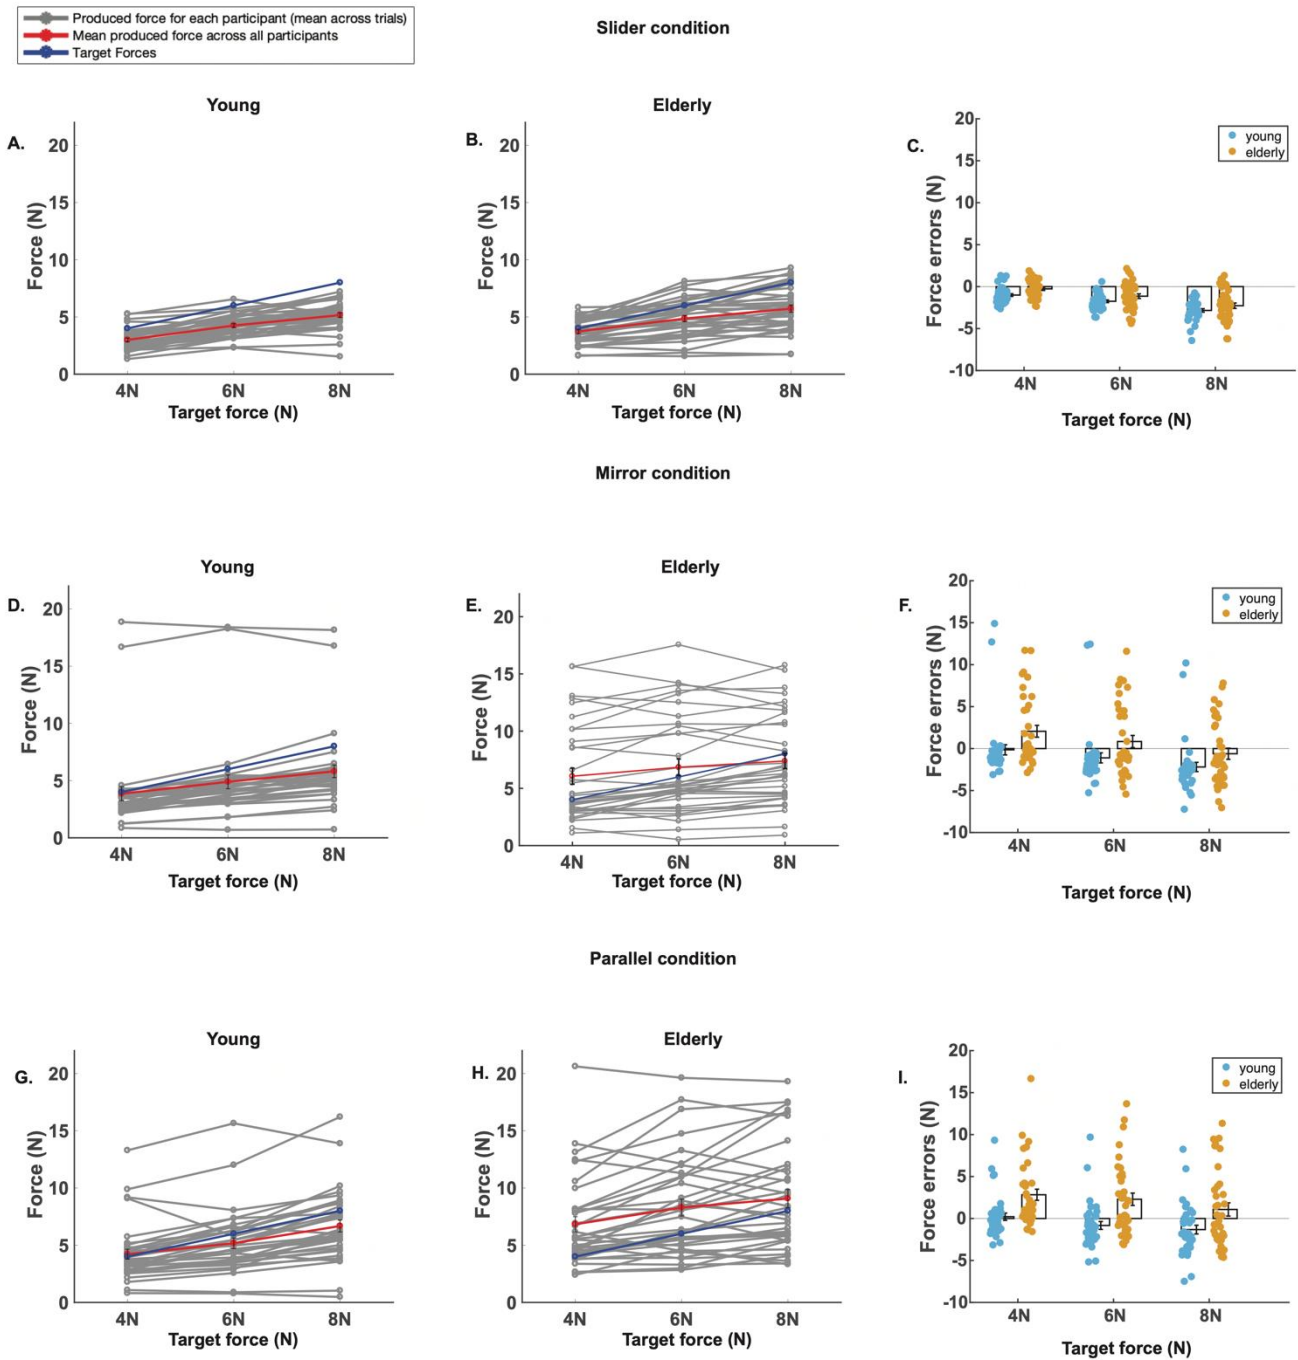

317 **Fig 3. Experiment 1: comparison of exerted forces and force errors of both age groups across the three**  
 318 **conditions.** Each row corresponds to a different condition (top row: slider; middle row: mirror; bottom row:  
 319 parallel). The average force exerted by the participants from the young (left column) and old group (middle  
 320 column) is presented. The gray traces represented the average force for each individual participants. The red trace  
 321 represents the group average. The blue trace corresponds to the target force. The X-axis shows the different force  
 322 levels. Y-axis is the produced Forces (N). The third column present the average force errors ( $N=35/\text{group}$ ) for  
 323 both age groups and each force level. Black rectangle and error bars of 3C, 3F and 3I represent the mean and  
 324 standard error respectively. Each dot is the average of all trials for each force level and for each participant.

325 Across all participants, in the slider condition, we observed that both older and young adults  
 326 were able to scale the forces that they produced with the level of target force but systematically  
 327 undershot the target forces across all three levels of forces. (Fig 3A and 3B). This contrasts with  
 328 the observation that older participants exerted higher forces than young adults in the direct

329 conditions (Fig 3D-E, G-H). While younger participants produced less force than the target  
330 force during the reproduction phase (Fig. 3D and 3G), the average reproduced force of older  
331 participants in the mirror and parallel conditions was higher than the target force in all but one  
332 case (8N target force in the mirror condition, Fig 3E and 3H). In addition, the produced forces  
333 appear to be larger in the parallel than in the mirror condition for both the young (Fig.3D vs.  
334 Fig.3G) and the older participants (Fig.3E and 3H).

### 335 Force errors are lower in younger than older adults in the Slider condition

336 To quantify these differences between age groups, we analyzed the mean force errors  
337 (difference between produced and target force, see data processing) between young and old  
338 participants across the three levels of forces for each condition separately, starting with the  
339 slider condition.

340 Participants from both age groups produced a force lower than the target force in the slider  
341 condition, leading to negative force errors (Fig 3C). Force errors were closer to zero in older  
342 (Fig 3C, represented by orange dots) than young adults. That is, their undershoot was smaller  
343 than that of young adults (Analysis 1, main effect age,  $F(1,68)=4.8$ ,  $p=0.03$ ,  $\eta^2_p=0.1402$ ). In  
344 addition, participants exhibited increasing negative force errors with increasing levels of forces  
345 (Analysis 1, main effect level of force,  $F(2, 136)= 137.5$ ,  $p<0.0001$ ,  $\eta^2_p=0.857$ ). This was  
346 consistent in young and older participants, as we did not detect a between-group difference in  
347 the scaling of the force errors with increasing target force (Analysis 1, level of force x age,  $F(2,$   
348  $136)= 0.311$ ,  $p=0.73$ ,  $\eta^2_p=0.0019$ ). If anything, the undershoot became larger with increasing  
349 levels of target force in young compared to old participants (Fig.3C). That is, this group of older  
350 participants performed at least as good if not better than their young counterparts in the slider  
351 condition.

352 The slider condition is linked to integrity of somatosensory function. This sensory function was  
353 also investigated by means of the position-matching task but this task (see methods) did not  
354 reveal any differences in somatosensory function between the young and older participants  
355 (supplementary note 3).

### 356 Older participants exert higher forces in direct conditions than younger 357 participants

358 The results from the slider condition and from the position-matching task suggest that our two  
359 age groups had similar somatosensory abilities. We then looked at differences in the direct  
360 conditions where sensory attenuation is supposed to happen.

361 In the mirror condition (Fig.3F), force errors in the young group were consistently more  
362 negative than those in the older group of participants. Mean force error of older participants  
363 was even positive for 4 and 6 N, indicating that the older participants produced more force than  
364 they should. Therefore, both young and older adults performed differently in the mirror  
365 condition with the magnitude of force errors being higher in the older adults (Analysis 1, main  
366 effect age  $F(1,68)=4.53$ ,  $p=0.037$ ,  $\eta^2_p=0.49$ ). With increasing levels of forces, the forces errors  
367 became more negative in the young participants and transitioned from positive to more negative  
368 in older ones (Analysis 1, main effect level of force,  $F(2, 136)=138.5$ ,  $p<0.0001$ ,  $\eta^2_p=0.499$ ).  
369 We could not find any evidence for a different scaling of force error with target force between  
370 the two age groups (Analysis 1, age x level of force,  $F(2, 136)= 2.47$ ,  $p=0.088$ ,  $\eta^2_p=0.0089$ ).

371 In the parallel condition (Fig 3I), the force errors of young group were positive for 4 N but  
372 negative 6 and 8N target forces. The mean force errors in older group was consistently positive  
373 for all levels of forces and was therefore higher (i.e. more positive) than the force errors of  
374 younger participants, indicating once again that the overshoot was larger in old compared to  
375 young participants (Analysis 1, main effect age  $F(1,68)=10.63$ ,  $p=0.0017$ ,  $\eta^2_p=0.79$ ). The force  
376 errors were again scaled with target force, becoming more negative with increasing levels of  
377 forces, the force errors became more negative in similar ways for both age groups (Analysis 1,  
378 main effect level of force,  $F(2, 136)=27$ ,  $p<0.0001$ ,  $\eta^2_p=0.19$ ). In this condition too, we could  
379 not find any evidence for a different scaling of force error with target force between the two  
380 age groups (Analysis 1, age x level of force,  $F(2, 136)= 1.37$ ,  $p=0.26$ ,  $\eta^2_p=0.0099$ )

381 In each age group separately, the participants produced different amount of forces in the  
382 different conditions, with force errors being more positive in parallel, followed by mirror and  
383 by slider (Analysis 2, main effect condition: young:  $F(2, 68)=3.82$ ,  $p=0.027$ ,  $\eta^2_p=0.31$ ; old:  
384  $F(2, 68)=16.75$ ,  $p<0.0001$ ,  $\eta^2_p=0.69$ ). This difference across conditions suggests that both  
385 groups exhibited some level of sensory attenuation. Similarly, the force errors became more  
386 negative with increasing level of target force for both groups (Analysis 2, main effect level of  
387 force: young:  $F(2, 68)=105.6$ ,  $p<0.0001$ ,  $\eta^2_p=0.67$ ; old:  $F(2, 68)=63.80$ ,  $p<0.0001$ ,  $\eta^2_p=0.29$ ).  
388 The scaling of the force errors with target force appeared to vary slightly across condition in  
389 both age groups (Analysis 2, level x condition: young:  $F(4,136)=2.64$ ,  $p=0.036$ ,  $\eta^2_p=0.019$ ;  
390 old:  $F(4,136)=1.95$ ,  $p=0.1$ ,  $\eta^2_p=0.01$ ).

391 We then directly compared the force errors between the two age groups directly. In addition to  
392 the influence of condition (Analysis 3, main effect condition  $F(2,136)=19.67$ ,  $p<0.001$ ,  $\eta^2_p$   
393  $=0.345$ ), level of force (main effect level of force,  $F(2,136)=150.7$ ,  $p<0.001$ ,  $\eta^2_p=0.261$ ) and

394 interaction (Analysis 3, level x condition,  $F(4,272)=3.02$ ,  $p=0.018$ ,  $\eta^2_p=0.006$ ) that we already  
395 highlighted above for both groups separately, we found that the difference in force errors  
396 between the slider condition and the two direct conditions (mirror and parallel) was larger for  
397 old than for young participants (Analysis 3, age x condition,  $F(2,136)=4.17$ ,  $p=0.017$ ,  $\eta^2_p$   
398  $=0.0733$ ). In other words, while participants from both groups undershot the target force in the  
399 slider condition, older participants exhibit an overshoot in the mirror and parallel conditions for  
400 most target force levels (positive force errors) while younger participants kept undershooting  
401 the target force (negative force errors).

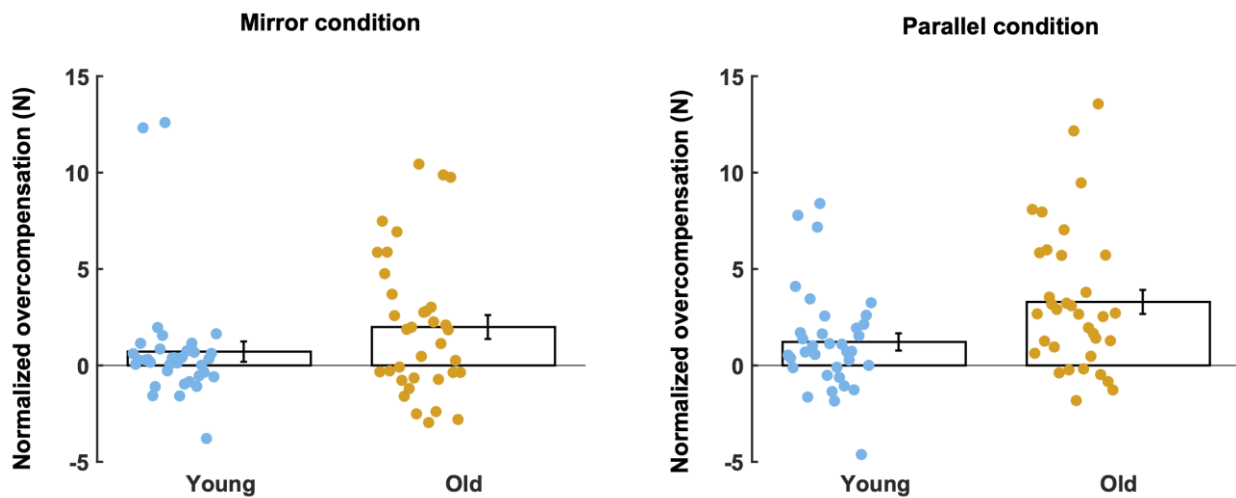

402

403 **Fig 4: Normalized Overcompensation (experiment 1).** The average normalized overcompensation is presented  
404 for each age group ( $N=35$ /group) and each condition (panel A: mirror condition; panel B: parallel condition).  
405 Each dot is the average normalized overcompensation for each individual (collapsed across force levels). The  
406 black rectangle represents the average across all participants for each group separately. The error bar represents  
407 the standard error of the mean.

408 **Higher overcompensation in parallel than in the mirror condition.**

409 To quantify the amount of sensory attenuation more accurately, we decided to take into account  
410 inter-subject difference in somatosensation (measured by the performance in the slider  
411 condition). To do so, we computed the normalized overcompensation by subtracting force  
412 errors measured in the slider condition from the force-errors observed in the direct conditions  
413 (Fig.4).

414 The mean normalized overcompensation was higher than zero in each direct condition for older  
415 adults but only in the parallel condition for younger adults (Analysis 4, young mirror:  
416  $t(34)=1.359$ ,  $p=0.1831$  CI= [-0.354 1.786]; young parallel:  $t(34)=2.7278$ ,  $p=0.01$ , C.I= [0.3107  
417 2.1263]; older mirror:  $t(34)=3.2181$ ,  $p=0.0028$  CI= [0.73 3.325]; older parallel:  $t(34)=5.286$ ,  
418  $p<0.001$  CI= [2.02 4.55]).

419 Older adults exhibited more sensory attenuation than young adults as showed by their higher  
420 mean normalized overcompensation (Analysis 4, main effect age  $F(1,68)=5.168$ ,  $p=0.0262$ ,  $\eta^2_p$   
421  $=0.71$ ). In addition, normalized overcompensation allows us to compare the amount of sensory  
422 attenuation between both direct conditions. The overcompensation was higher in the parallel  
423 than in the mirror condition (Analysis 4, main effect condition  $F(1,68)=10.02$ ,  $p=0.0023$ ,  $\eta^2_p$   
424  $=0.2$ ). However, we did not find any evidence that this difference between conditions was  
425 different for the two age groups (Analysis 4, age x condition  $F(1,68)=1.96$ ,  $p=0.166$ ,  $\eta^2_p=0.04$ )  
426 **Replication of higher sensory attenuation with age in the mirror condition**

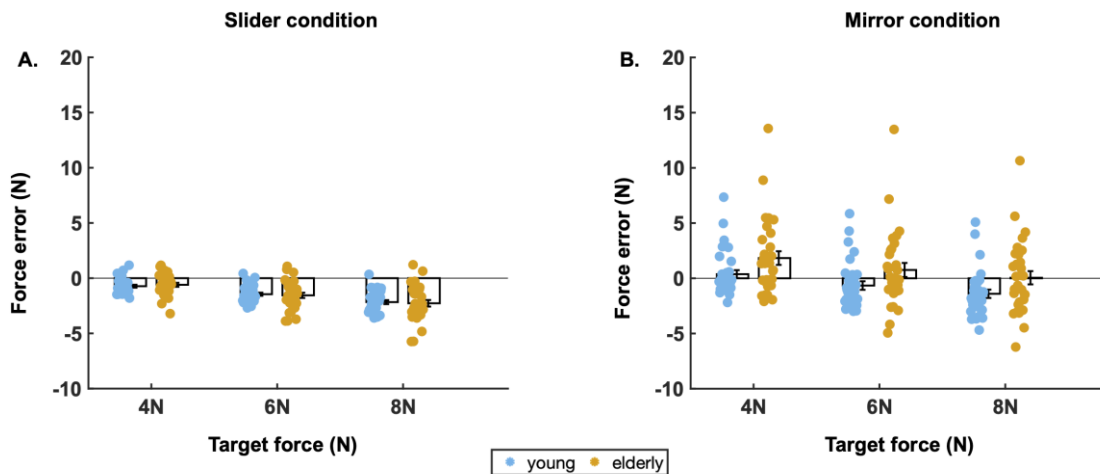

427

428 **Fig 5: Comparison of force error between age groups (experiment 2).** The average force errors ( $N=31$  young,  
429  $N=30$  old) for both age groups and each force level for the slider condition (panel A) and mirror condition (panel  
430 B). Black rectangle and error bars represent the mean and standard error respectively. Each dot is the average  
431 across all trials for each force level and for each participant separately.

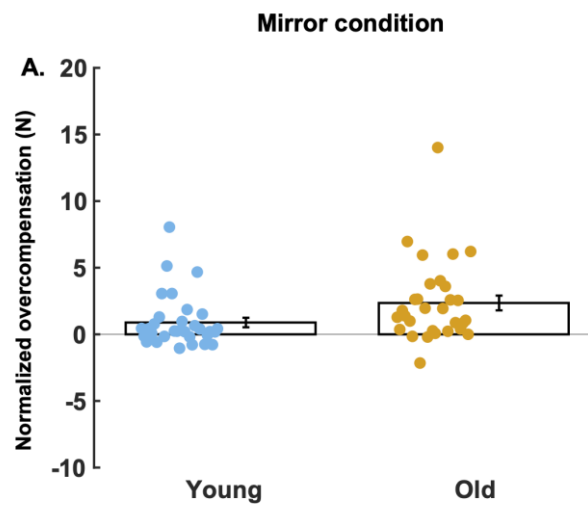

432

433 **Fig 6. Normalized Overcompensation (experiment 2).** The average normalized overcompensation is presented  
434 for each age group ( $N=31$  young,  $N=30$  old) in the mirror condition. Each dot represents the average normalized



435 *overcompensation for each individual (collapsed across force levels). The black rectangle represents the average*  
436 *across all participants for each group separately. The error bar represents the standard error of the mean.*

437 Explaining the task to the participants in experiment 1 was much harder than anticipated. We  
438 were therefore worried that some of the effects could be driven by the fact that the older  
439 participants did not understand the instructions correctly. Therefore, we redesigned the task  
440 training (see methods) and performed a replication of our mirror and slider conditions. In  
441 contrast to Experiment 1, we did not find any evidence that the young and older adults  
442 performed differently in the slider condition (Analysis 5, main effect of age:  $F(1, 59)=0.0109$ ,  
443  $p=0.9173$ ,  $\eta^2_p=0.0004$ ). The force errors varied across the three levels of forces as they become  
444 more negative with increasing levels of target forces (Analysis 5,  $F(2,118)=99.91$ ,  $p<0.0001$ ,  
445  $\eta^2_p=0.99$ ). For this group of participants, the results of the position-matching task (see  
446 methods) did not reveal any differences between the two age groups in the somatosensory  
447 abilities (supplementary note 3).

448 In the mirror condition, young and older participants exhibited different pattern of force error  
449 (Fig.5b). Older participants were mostly overshooting the target force (positive force error)  
450 while the younger participants undershot it (Analysis 5,  $F(1,59)=4.096$ ,  $p=0.0475$ ,  $\eta^2_p=0.492$ ).  
451 In addition, young and older adults showed difference in their force errors across the three levels  
452 of forces. Here again, a scaling effect difference was detected (Analysis 5,  $F(2,118)=91.4344$ ,  
453  $p<0.0001$ ,  $\eta^2_p=0.5$ ).

454 Young adults exhibited less undershoot in the mirror than in the slider condition (Analysis 6,  
455 main effect condition:  $F(1,30)=6.15$ ,  $p=0.0189$ ,  $\eta^2_p=0.3096$ ). The older participants even  
456 exhibit an overshoot in the mirror condition while they also undershot the target force in the  
457 slider condition (Analysis 6, main effect condition:  $17.44$ ,  $p<0.0001$ ,  $\eta^2_p=0.7335$ ). For both  
458 age groups, force errors became more negative with increasing levels of forces (Analysis 6,  
459 main effect level of force: young:  $F(2,60)=90.88$ ,  $p<0.0001$ ,  $\eta^2_p=0.68$ ; old: main effect level  
460 of force  $F(2,58)=60.7$ ,  $p<0.0001$ ,  $\eta^2_p=0.2661$ ). However, the difference in force errors across  
461 the two conditions (mirror vs. slider) was larger in older participants compared to their younger  
462 counterparts (Analysis 7, age x condition,  $F(1,59)=4.9002$ ,  $p=0.03$ ,  $\eta^2_p=0.097$ ).

463 As a result, the normalized overcompensation was positive for both young and old participants  
464 (Analysis 8, young:  $t(30)=2.48$ ,  $p=0.0189$ ,  $CI=[0.15, 1.61]$ ; old:  $t(29)=4.17$ ,  $p<0.001$ ,  $CI=[1.2$   
465  $3.5]$ ) (Fig.6). Furthermore, this normalized overcompensation was larger for older compared to  
466 younger participants (Analysis 8, main effect age,  $F(1, 59)=4.9$ ,  $p=0.0307$ ,  $\eta^2_p=0.9764$ ). This  
467 confirms the results from our first experiment that sensory attenuation was higher in older than  
468 younger adults.

## 469 Discussion

470 In our study, we found that both young and old participants exerted higher forces in the direct  
471 conditions (self-produced forces) than in the slider condition but this overcompensation was  
472 even higher in older participants. We did not find any evidence that force reproduction in the  
473 slider condition or accuracy in a position-matching task (which were our proxies for  
474 somatosensory function) were affected by age. While an increase in sensory attenuation with  
475 age (Klever et al. 2019; Wolpe et al. 2016) had been observed for the fingers, we confirm that  
476 this phenomenon generalized to another effector: the arm.

### 477 Higher reliance on internal forward models with aging

478 By normalizing our data with respect to the slider condition, we were able to remove the  
479 influence of the somatosensory component and to isolate sensory attenuation. Our findings  
480 show that older participants had a higher sensory attenuation than younger adults did. An  
481 advantage of increased attenuation could indicate a preservation of a sense of agency or the  
482 sense that one controls one's own actions and their consequences (Wolpe et al. 2016). Reduced  
483 sensory attenuation has been linked to impaired awareness of action and disorders such as  
484 schizophrenia and psychogenic movement disorders (Shergill et al. 2003; Wolpe et al. 2016).

485 The observed increase in sensory attenuation from this study together with their supposed age-  
486 related decline in sensory function (Dunn et al., 2015, Goble et al. 2009) suggests that elderly  
487 adults might rely more on the internal models (Wolpe et al. 2016). When a perceived force is  
488 self-produced, the sensation is a combination of sensory information with the predicted sensory  
489 consequences of the force generation (coming from the internal model). These signals are  
490 combined via Bayesian integration in function of their reliability (Körding et al. 2004; Orban  
491 de Xivry et al. 2013). Given that proprioceptive input becomes less reliable with increasing age,  
492 the weight of the internal model (which is shown not to be impaired by aging) becomes larger  
493 (Wolpe et al. 2016). In other words, there is a higher weighting on the internal model during  
494 the parallel processes involving both the internal model and sensory system when making a  
495 prediction (Bubic et al. 2010). Many studies have shown aging changes weighting on  
496 sensorimotor predictions during movements (Klever et al. 2019; Moran et al. 2014). Studies  
497 also have shown internal forward model function does not change with aging (Heuer et al. 2011;  
498 Vandevorde and Orban de Xivry 2019).

499 While there is a shift towards higher sensory attenuation with aging, a shift in the opposite  
500 direction is observed in cerebellar patients or in people with schizophrenia (Knolle et al. 2013;  
501 Shergill et al. 2005). This shows that sensory attenuation is the outcome of an adaptable

502 combination between sensory and predictive signals in function of their reliability such as been  
503 observed in different contexts (Bogadhi et al. 2013; Deravet et al. 2018; Ernst and Banks 2002;  
504 Orban de Xivry et al. 2013). The increase in sensory attenuation with aging shows that the  
505 reliability of the sensory signal decreases faster with aging than the reliability of the internal  
506 model signal (Wolpe et al. 2016).

### 507 **We did not observe an age-related decrement in somatosensory function**

508 It remains to be understood why older participants assign a higher weight to their internal  
509 predictions while we did not find any impairment in sensory function. Indeed, we could not  
510 find any age-related differences in either the slider condition or the position-matching task in  
511 our samples.

512 Previous studies show that sensory function and proprioceptive acuity decrease with aging  
513 (Dunn et al. 2015; Goble et al. 2009; Ranganathan et al. 2001). In the slider condition,  
514 participants only had to indicate the perceived force on a slider; there were no self-produced  
515 forces. This condition provides us with a proxy for somatosensory function. Our results from  
516 both experiments show that both young and elderly adults undershot the target forces. In  
517 experiment 1, this undershoot was larger for the young participants. Hence, elderly participants  
518 were more accurate, i.e. their produced forces were closer to target forces. However, in  
519 experiment 2, we did not observe such age-related difference. In contrast, young adults from  
520 the study of Wolpe et al. (2016) were on average less accurate than the older adults but, in  
521 contrast to our experiment, they overshot the target forces.

522 Both our experiments and that from Wolpe et al. used different level of target forces. In Wolpe  
523 et al., the older participants scaled their produced forces with target force less accurately than  
524 the younger participants did. In our study, we found that both age groups exhibited a larger  
525 undershoot with increasing levels of target force. However, we failed to find any evidence for  
526 an effect of age on the scaling of the produced force with the target force in the slider condition  
527 in both experiments. Walsh et al. (2011) report a similar finding in their finger force matching  
528 experiment that subjects overestimated smaller target forces than larger ones. Their matched  
529 forces were 2-3 N higher than the smaller target forces.

530 Overall, across the 130 participants, there were no differences in somatosensory processing  
531 between the two age groups as opposed to what was shown by previous studies (Dunn et al.  
532 2015; Goble et al. 2009; Morrison and Newell 2012; Ranganathan et al. 2001). This can maybe  
533 attributed to the fact that our participants were probably more active than general population of  
534 the age groups between 55-75 years. In addition, our mean age in the elderly (mean=64 years)

535 was lower than the mean age of elderly in previous studies (mean= 71 years, Goble et al, Doumas  
536 et al 2008).

537 Yet, while our older participants did not exhibit any impairment in somatosensation, they did  
538 exhibit increased sensory attenuation. This begs the question whether the observed increase in  
539 sensory attenuation is due to poor sensory function as suggested by Wolpe et al. 2016. It rather  
540 seems to violate the idea that the increase in sensory attenuation is due to a shift in reliability-  
541 based balance between predictive and sensory signals. One possibility is that the average  
542 performance is similar but that the confidence in the sensory estimates is degraded with aging.  
543 Unfortunately, none of our somatosensory tasks have enough repetitions (maximum 10) to  
544 measure standard deviation in a reliable way.

### 545 **Sensory attenuation is higher in parallel condition than in the mirror**

546 We used two different direct conditions where the force exerted by the right arm was directly  
547 felt on the left arm. In the mirror condition, the biceps of the right arm and the triceps of the left  
548 arm were simultaneously activated (non-homologous muscles). In contrast, in the parallel  
549 condition, both arms' biceps muscles (homologous muscles) were simultaneously activated.  
550 Our results show that sensory attenuation is higher when homologous muscles are activated.

551 Humans naturally couple limb movements and it is usually easier to move limbs in the same  
552 direction and contract homologous muscles (Huang and Ferris 2009; Meesen et al. 2006,  
553 Baldiserra et al., 1982). In addition, humans identify and perceive forces applied by the hand in  
554 terms of the motor activity required to resist or produce the force or a “sense of effort” rather  
555 than in terms of a perceived force magnitude (Toffin et al. 2003). In other words, force  
556 perception is controlled by the ease of resisting it rather than the actual force magnitude (Van  
557 Beek et al 2013). Given the more natural connections between homologous muscles, we  
558 postulate that the sense of effort required to contract homologous muscles was felt as lower in  
559 the parallel condition, which could explain the larger overshoot in this condition if one tries to  
560 match the effort perceived in the force perception phase.

561 In our study, there activation of the homologous muscles was coupled to a change in direction  
562 of the force in the left arm. While we are confident that it does not largely affect the amount of  
563 overcompensation, this could even become larger if the force direction was not changed. A  
564 future study could reproduce this result in the absence of change of force direction.

### 565 **Limitations**

566 While we have shown the effect of sensory attenuation on the arms, further investigation is  
567 required on the age-related differences between the mirror and parallel conditions. In the

568 parallel condition, there was both an activation of homologous muscles and change in direction  
569 of movement. We believe that this change in direction did not play a big role in the result of the  
570 present study. Yet, a future study could correct this mistake and involve pushing the right arm  
571 in the rightward direction and the transmission in the rightward direction. Further studies on  
572 somatosensation on the arm are required to explore the age-related differences or similarities  
573 deeper.

574 In addition, the understanding of the task instructions by the participants could have had an  
575 influence on the performance. We overcame this limitation in experiment 2 with clearer task  
576 instructions. Nevertheless, participants in both experiments reported that the task was difficult  
577 to follow, and future studies must be done with careful consideration to the development of  
578 detailed task instructions.

579 Moreover, the participants in our study was limited in number, and we divided them into two  
580 arbitrary age groups (N=35 for each of them in experiment 1 and N=30/group in experiment 2).  
581 Future studies are warranted to include a larger participant pool from a larger age range, such  
582 that it will also be possible to conduct correlation analyses between age and behavioral indices.

## 583 Conclusion

584 Our force-matching paradigm sheds a new light on the effect of aging on sensory attenuation  
585 and somatosensation. First, we confirmed that sensory attenuation can be observed in the arms,  
586 similar to what has been found for the fingers (Logan et al. 2019; Shergill et al. 2003; Walsh et  
587 al. 2011; Wolpe et al. 2016) and that this is a phenomenon that goes beyond the fingers. Second,  
588 we replicated the finding that sensory attenuation is larger in adults over 55 years. The Bayesian  
589 perspective adopted by Wolpe et al. would let us interpret these results as indicative of a shift  
590 in the balance between sensory and predictive signals, which is in line with the hypothesis that  
591 internal model function is unaffected by aging (Heuer et al. 2011; Vandevoorde and Orban de  
592 Xivry 2019). Yet, in our sample, we did not detect any difference in somatosensory function  
593 between our two age groups. This leads us to question the fact that the increased sensory  
594 attenuation with age is due to a deficit in proprioception.

## 595 Supplementary information

596 All supplementary information, raw data, processed data and scripts are available [here](#).

597

## 598 References

- 599 **Beaulé V, Tremblay S, Théoret H.** Interhemispheric control of unilateral movement. *Neural*  
600 *Plast* 2012, 2012.
- 601 **Bernard JA, Seidler RD.** Moving forward: Age effects on the cerebellum underlie cognitive  
602 and motor declines. *Neurosci Biobehav Rev* 42: 193–207, 2014.
- 603 **Blakemore SJ, Wolpert D, Frith C.** Why can't you tickle yourself? *Neuroreport* 11: R11–  
604 R16, 2000.
- 605 **Bogadhi AR, Montagnini A, Masson GS.** Dynamic interaction between retinal and  
606 extraretinal signals in motion integration for smooth pursuit. *J Vis* 13: 1–26, 2013.
- 607 **Brown H, Adams RA, Parees I, Edwards M, Friston K.** Active inference, sensory  
608 attenuation and illusions. *Cogn Process* 14: 411–427, 2013.
- 609 **Bubic A, Yves von Cramon D, Schubotz RI.** Prediction, cognition and the brain. *Front Hum*  
610 *Neurosci* 4: 1–15, 2010.
- 611 **Cao L, Thut G, Gross J.** The role of brain oscillations in predicting self-generated sounds.  
612 *Neuroimage* 147: 895–903, 2017.
- 613 **Cullen KE, Brooks JX, Jamali M, Carriot J, Massot C.** Internal models of self-motion:  
614 Computations that suppress vestibular reafference in early vestibular processing. *Exp Brain Res*  
615 210: 377–388, 2011.
- 616 **Deravet N, Blohm G, de Xivry JJO, Lefèvre P.** Weighted integration of short-term memory  
617 and sensory signals in the oculomotor system. *J Vis* 18: 1–19, 2018.
- 618 **Desantis A, Hughes G, Waszak F.** Intentional binding is driven by the mere presence of an  
619 action and not by motor prediction. *PLoS One* 7, 2012.
- 620 **Dickinson MH, Muijres FT.** The aerodynamics and control of free flight Manoeuvres in  
621 *Drosophila*. *Philos Trans R Soc B Biol Sci* 371, 2016.
- 622 **Dukelow SP, Herter TM, Moore KD, Demers MJ, Glasgow JI, Bagg SD, Norman KE,**  
623 **Scott SH.** Quantitative assessment of limb position sense following stroke. *Neurorehabil*  
624 *Neural Repair* 24: 178–187, 2010.
- 625 **Dunn W, Griffith JW, Sabata D, Morrison MT, MacDermid JC, Darragh A, Schaaf R,**  
626 **Dudgeon B, Connor LT, Carey L, Tanquary J.** Measuring change in somatosensation across  
627 the lifespan. *Am J Occup Ther* 69: 6903290020, 2015.

- 628 **Ernst MO, Banks MS.** Ernst 2002 Humans integrate visual and haptic information in a. *Nature*  
629 415: 429–433, 2002.
- 630 **Folstein MF, Folstein SE, McHugh PR.** “Mini-mental state”. A practical method for grading  
631 the cognitive state of patients for the clinician. *J Psychiatr Res* , 1975. doi:10.1016/0022-  
632 3956(75)90026-6.
- 633 **Franklin DW, Wolpert DM.** Computational mechanisms of sensorimotor control. *Neuron* 72:  
634 425–442, 2011.
- 635 **Fuentes CT, Bastian AJ.** Where is your arm? Variations in proprioception across space and  
636 tasks. *J Neurophysiol* 103: 164–171, 2010.
- 637 **Gentsch A, Schütz-Bosbach S.** I did it: Unconscious expectation of sensory consequences  
638 modulates the experience of self-agency and its functional signature. *J Cogn Neurosci* 23:  
639 3817–3828, 2011.
- 640 **Goble DJ, Coxon JP, Wenderoth N, Van Impe A, Swinnen SP.** Proprioceptive sensibility in  
641 the elderly: Degeneration, functional consequences and plastic-adaptive processes. *Neurosci*  
642 *Biobehav Rev* 33: 271–278, 2009.
- 643 **Heuer H, Hegele M, Sülzenbrück S.** Implicit and explicit adjustments to extrinsic visuo-motor  
644 transformations and their age-related changes. *Hum Mov Sci* 30: 916–930, 2011.
- 645 **Huang HJ, Ferris DP.** Upper and lower limb muscle activation is bidirectionally and  
646 ipsilaterally coupled. *Med Sci Sports Exerc* 41: 1778–1789, 2009.
- 647 **Kilteni K, Ehrsson HH.** Sensorimotor predictions and tool use: Hand-held tools attenuate self-  
648 touch. *Cognition* 165: 1–9, 2017.
- 649 **Kilteni K, Henrik Ehrsson H.** Functional connectivity between the cerebellum and  
650 somatosensory areas implements the attenuation of self-generated touch. *J Neurosci* 40: 894–  
651 906, 2020.
- 652 **Kirk MD.** Presynaptic inhibition in the crayfish CNS: Pathways and synaptic mechanisms. *J*  
653 *Neurophysiol* 54: 1305–1325, 1985.
- 654 **Klaffehn AL, Baess P, Kunde W, Pfister R.** Sensory attenuation prevails when controlling  
655 for temporal predictability of self- and externally generated tones. *Neuropsychologia* 132:  
656 107145, 2019.

- 657 **Klever L, Voudouris D, Fiehler K, Billino J.** Age effects on sensorimotor predictions: What  
658 drives increased tactile suppression during reaching? *J Vis* 19: 9, 2019.
- 659 **Knolle F, Schröger E, Kotz SA.** Cerebellar contribution to the prediction of self-initiated  
660 sounds. *Cortex* 49: 2449–2461, 2013.
- 661 **Kok P, Jehee JFM, de Lange FP.** Less Is More: Expectation Sharpens Representations in the  
662 Primary Visual Cortex. *Neuron* 75: 265–270, 2012.
- 663 **Körding KP, Ku SP, Wolpert DM.** Bayesian integration in force estimation. *J Neurophysiol*  
664 92: 3161–3165, 2004.
- 665 **de Lange FP, Heilbron M, Kok P.** How Do Expectations Shape Perception? *Trends Cogn Sci*  
666 22: 764–779, 2018.
- 667 **Logan LM, Semrau JA, Cluff T, Scott SH, Dukelow SP.** Effort matching between arms  
668 depends on relative limb geometry and personal control. *J Neurophysiol* 121: 459–470, 2019.
- 669 **Machado S, Cunha M, Velasques B, Minc D, Teixeira S, Domingues CA, Silva JG, Bastos**  
670 **VH, Budde H, Cagy M, Basile L, Piedade R, Ribeiro P.** Sensorimotor integration: basic  
671 concepts, abnormalities related to movement disorders and sensorimotor training-induced  
672 cortical reorganization. *Rev Neurol* 51: 427–36, 2010.
- 673 **Meesen RLJ, Wenderoth N, Temprado JJ, Summers JJ, Swinnen SP.** The coalition of  
674 constraints during coordination of the ipsilateral and heterolateral limbs. *Exp Brain Res* 174:  
675 367–375, 2006.
- 676 **Moore JW, Wegner DM, Haggard P.** Modulating the sense of agency with external cues.  
677 *Conscious Cogn* 18: 1056–1064, 2009.
- 678 **Moran RJ, Symmonds M, Dolan RJ, Friston KJ.** The Brain Ages Optimally to Model Its  
679 Environment: Evidence from Sensory Learning over the Adult Lifespan. *PLoS Comput Biol* 10,  
680 2014.
- 681 **Morrison S, Newell KM.** Aging, neuromuscular decline, and the change in physiological and  
682 behavioral complexity of upper-limb movement dynamics. *J Aging Res* 2012, 2012.
- 683 **Niziolek CA, Nagarajan SS, Houde JF.** What does motor efference copy represent? evidence  
684 from speech production. *J Neurosci* 33: 16110–16116, 2013.
- 685 **Oldfield RC.** The assessment and analysis of handedness: The Edinburgh inventory.  
686 *Neuropsychologia* , 1971. doi:10.1016/0028-3932(71)90067-4.



- 687 **Orban de Xivry JJO, Coppe S, Blohm G, Lefèvre P.** Kalman filtering naturally accounts for  
688 visually guided and predictive smooth pursuit dynamics. *J Neurosci* 33: 17301–17313, 2013.
- 689 **Palmer CE, Davare M, Kilner JM.** Physiological and perceptual sensory attenuation have  
690 different underlying neurophysiological correlates. *J Neurosci* 36: 10803–10812, 2016.
- 691 **Ranganathan VK, Siemionow V, Sahgal V, Yue GH.** Effects of aging on hand function. *J*  
692 *Am Geriatr Soc* 49: 1478–1484, 2001.
- 693 **Rummell BP, Klee JL, Sigurdsson T.** Attenuation of responses to self-generated sounds in  
694 auditory cortical neurons. *J Neurosci* 36: 12010–12026, 2016.
- 695 **Sangani S, Lamontagne A, Fung J.** Cortical mechanisms underlying sensorimotor  
696 enhancement promoted by walking with haptic inputs in a virtual environment. 1st ed. Elsevier  
697 B.V.
- 698 **Sato A.** Action observation modulates auditory perception of the consequence of others'  
699 actions. *Conscious Cogn* 17: 1219–1227, 2008.
- 700 **Shadmehr R, Smith MA, Krakauer JW.** Error Correction, Sensory Prediction, and  
701 Adaptation in Motor Control. *Annu Rev Neurosci* 33: 89–108, 2010.
- 702 **Shergill SS, Bays PH, Frith CD, Wolpert DM.** Two eyes for an eye: The neuroscience of  
703 force escalation. *Science (80- )* 301: 187, 2003.
- 704 **Shergill SS, Samson G, Bays PM, Frith CD, Wolpert DM.** Evidence for sensory prediction  
705 deficits in schizophrenia. *Am J Psychiatry* 162: 2384–2386, 2005.
- 706 **Shinohara M, Keenan KG, Enoka RM.** Contralateral activity in a homologous hand muscle  
707 during voluntary contractions is greater in old adults. *J Appl Physiol* 94: 966–974, 2003.
- 708 **Sillar KT, Roberts A.** A neuronal mechanism for sensory gating during locomotion in a  
709 vertebrate. 2–5, 1988.
- 710 **Sommer MA, Wurtz RH.** Brain Circuits for the Internal Monitoring of Movements. *Annu Rev*  
711 *Neurosci* 31: 317–338, 2008.
- 712 **Toffin D, McIntyre J, Droulez J, Kemeny A, Berthoz A.** Perception and Reproduction of  
713 Force Direction in the Horizontal Plane. *J Neurophysiol* 90: 3040–3053, 2003.
- 714 **Vandevorde K, Orban de Xivry JJ.** Internal model recalibration does not deteriorate with  
715 age while motor adaptation does. *Neurobiol Aging* 80: 138–153, 2019.

- 716 **Walsh LD, Taylor JL, Gandevia SC.** Overestimation of force during matching of externally  
717 generated forces. *J Physiol* 589: 547–557, 2011.
- 718 **Webb B.** Neural mechanisms for prediction: Do insects have forward models? *Trends Neurosci*  
719 27: 278–282, 2004.
- 720 **Weiss C, Herwig A, Schütz-Bosbach S.** The self in social interactions: Sensory attenuation of  
721 auditory action effects is stronger in interactions with others. *PLoS One* 6: 16–18, 2011.
- 722 **Wolpe N, Ingram JN, Tsvetanov KA, Geerligs L, Kievit RA, Henson RN, Wolpert DM,**  
723 **Rowe JB.** Ageing increases reliance on sensorimotor prediction through structural and  
724 functional differences in frontostriatal circuits. *Nat Commun* 7: 1–11, 2016.
- 725 **Wolpert DM, Ghahramani Z, Jordan MI.** An internal model for sensorimotor integration.  
726 *Science* (80- ) 269: 1880–1882, 1995a.
- 727 **Wolpert DM, Ghahramani Z, Jordan MI.** An internal model for sensorimotor integration.  
728 *Science* (80- ) 269: 1880–1882, 1995b.
- 729 **Wolpert DM, Miall RC.** Forward Models for Physiological Motor Control. *Neural Networks*  
730 9: 1265–1279, 1996.
- 731
- 732
- 733
- 734
- 735
- 736
- 737
- 738
- 739
- 740
- 741
- 742
- 743
- 744
- 745
- 746

Fig 1.

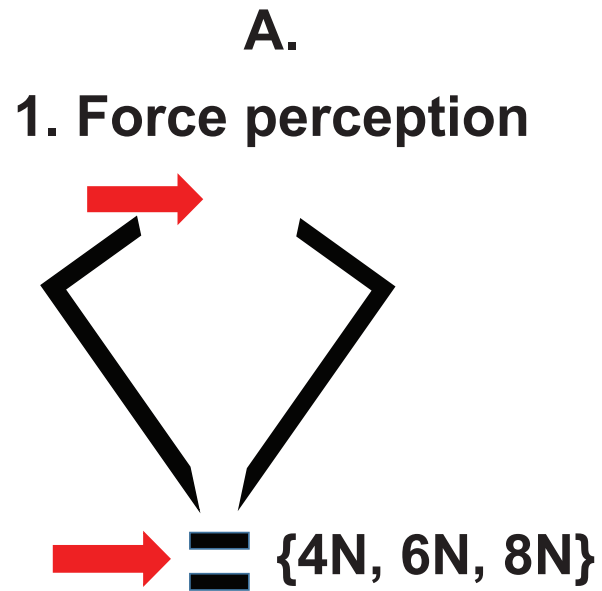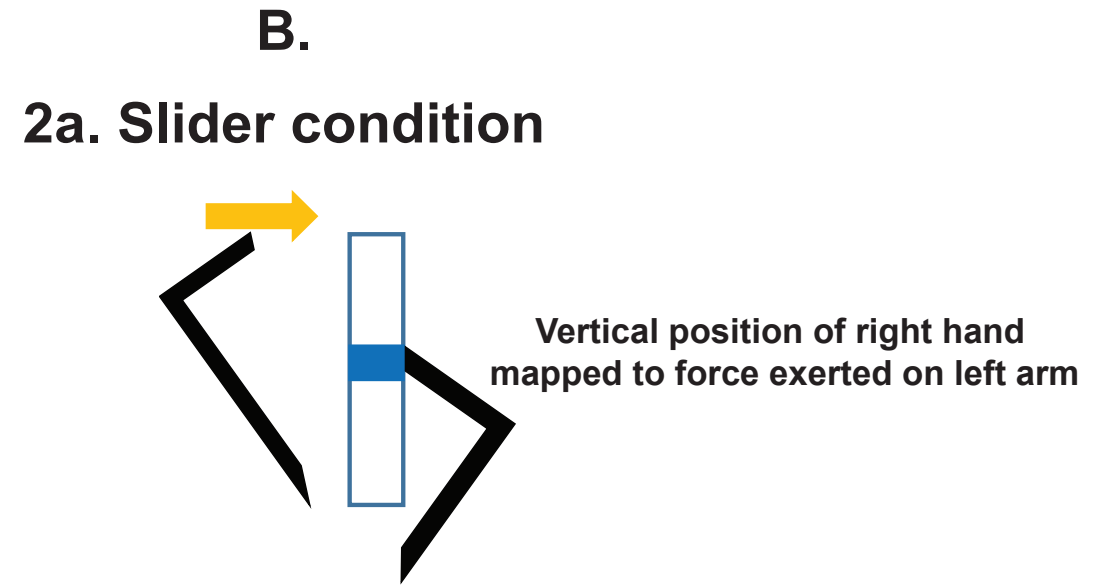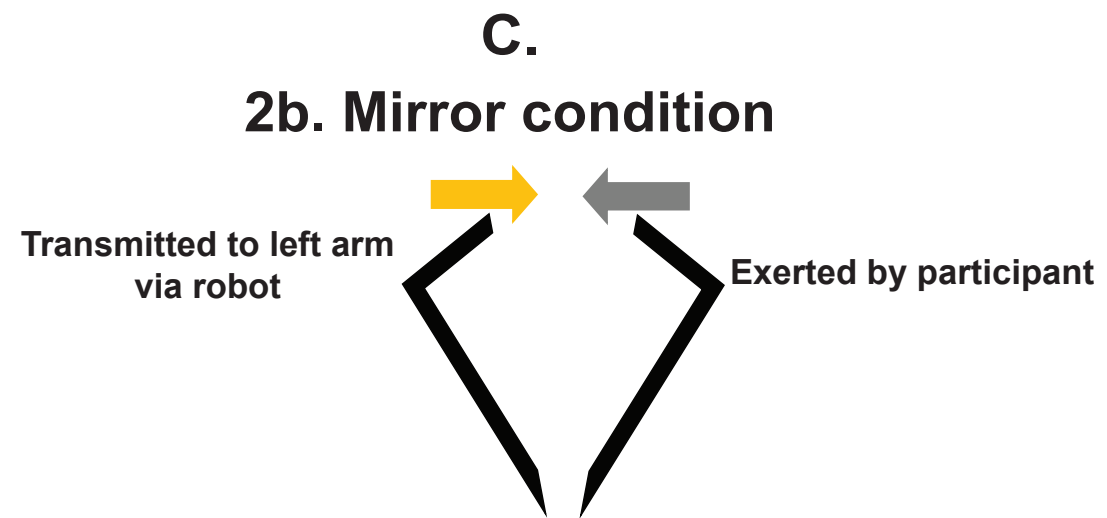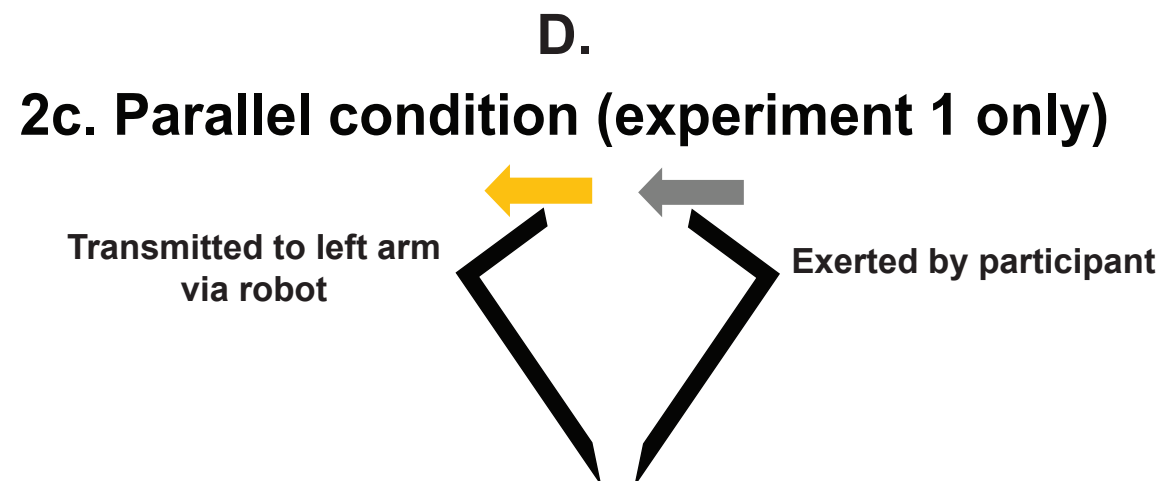

Fig 2.

Slider condition

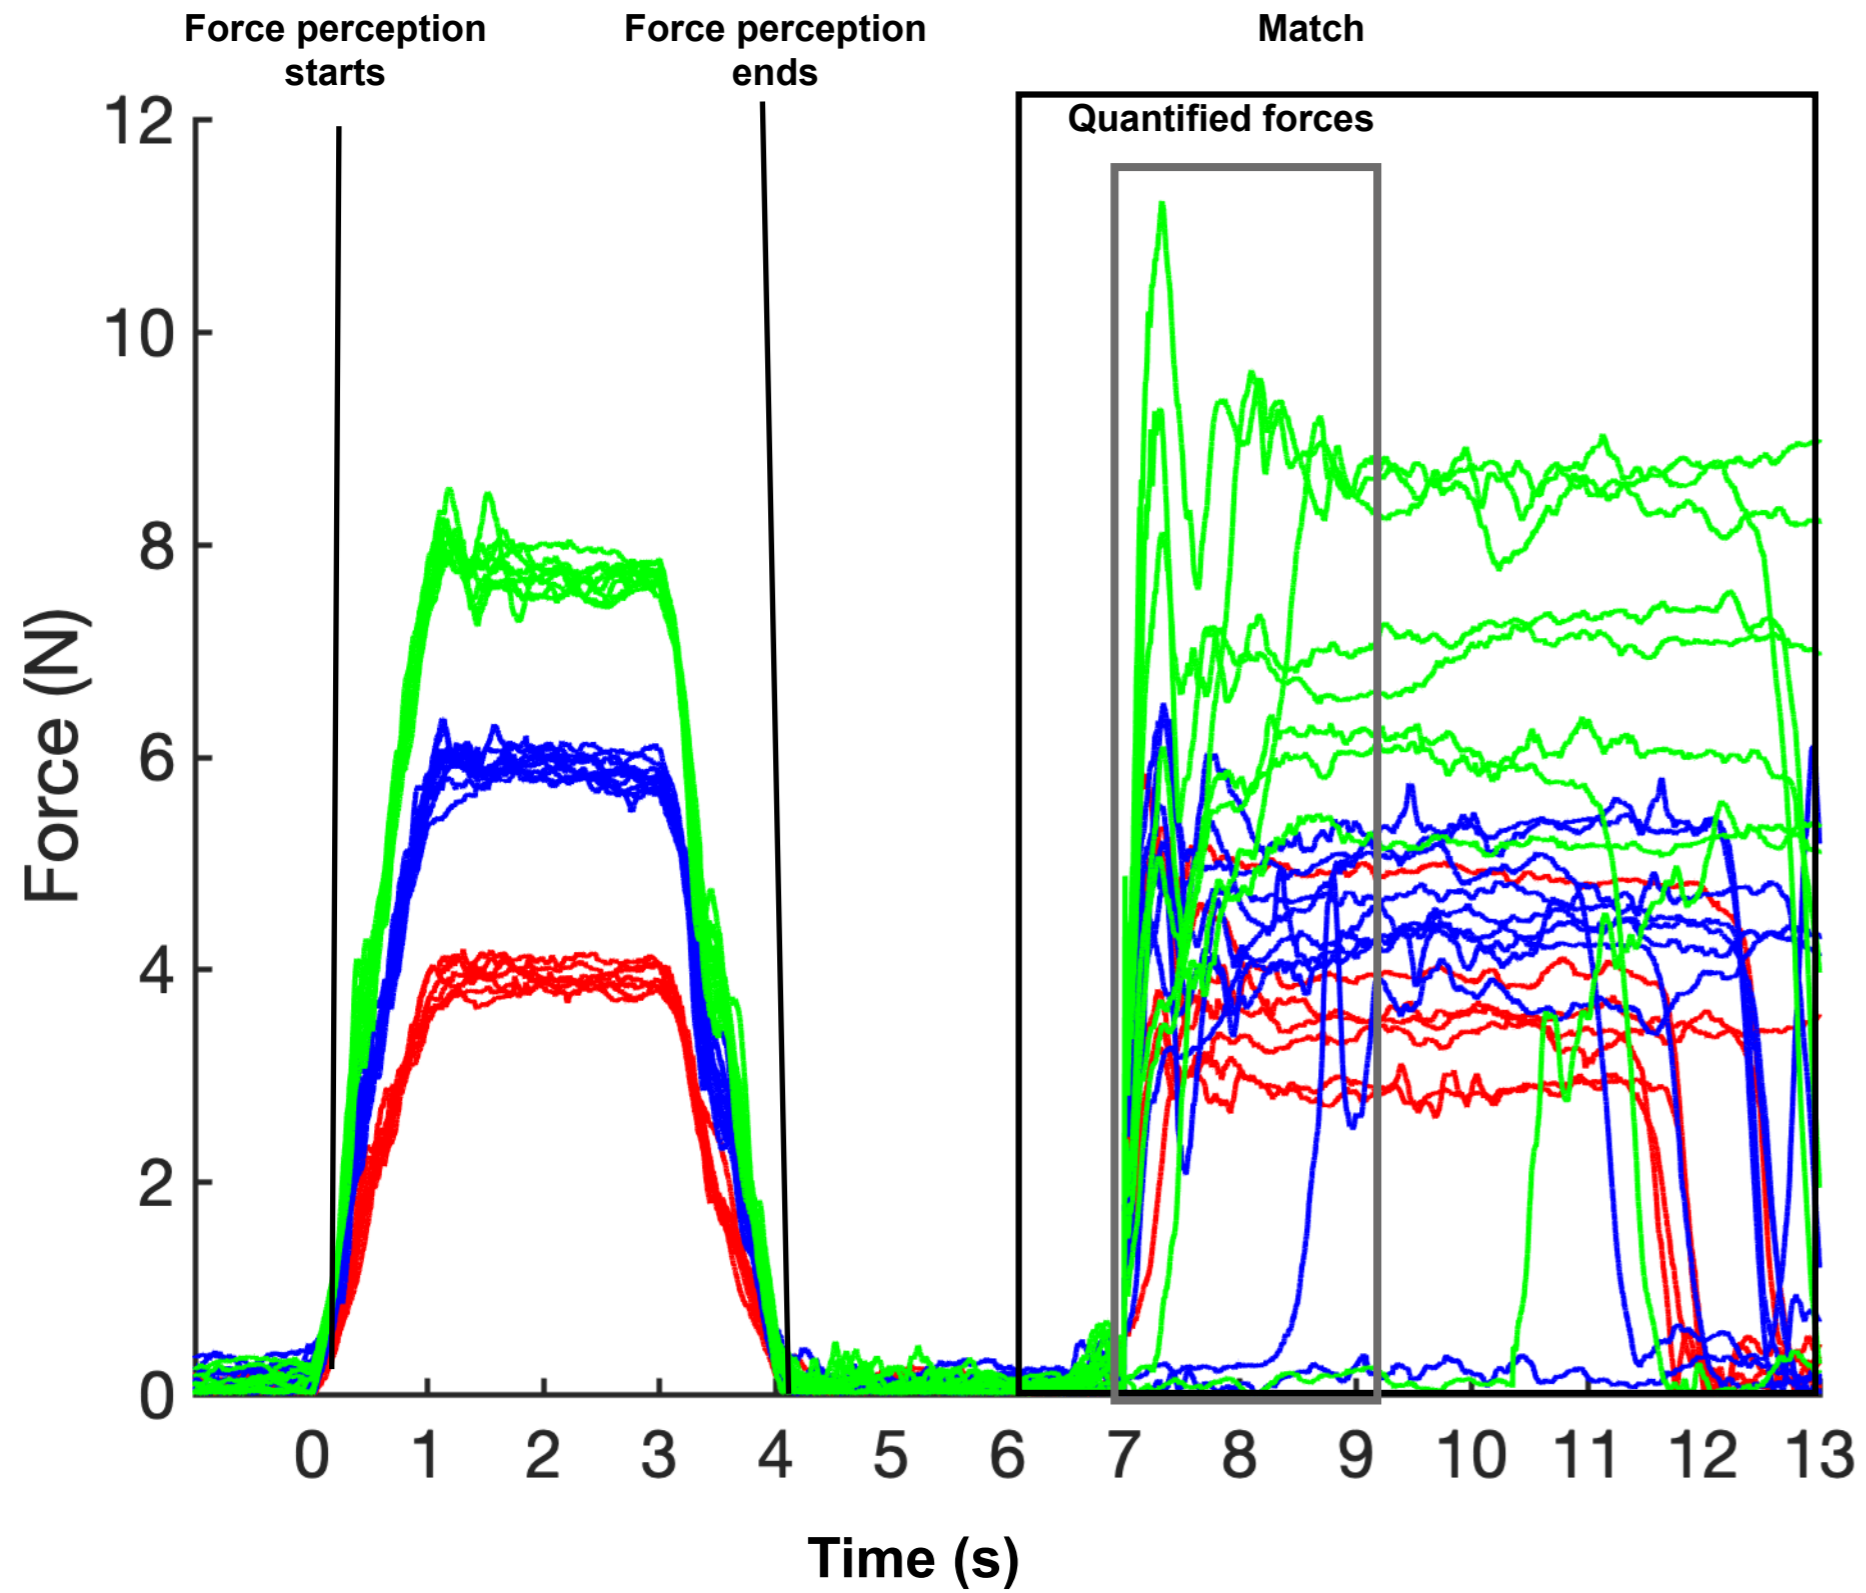

Mirror condition

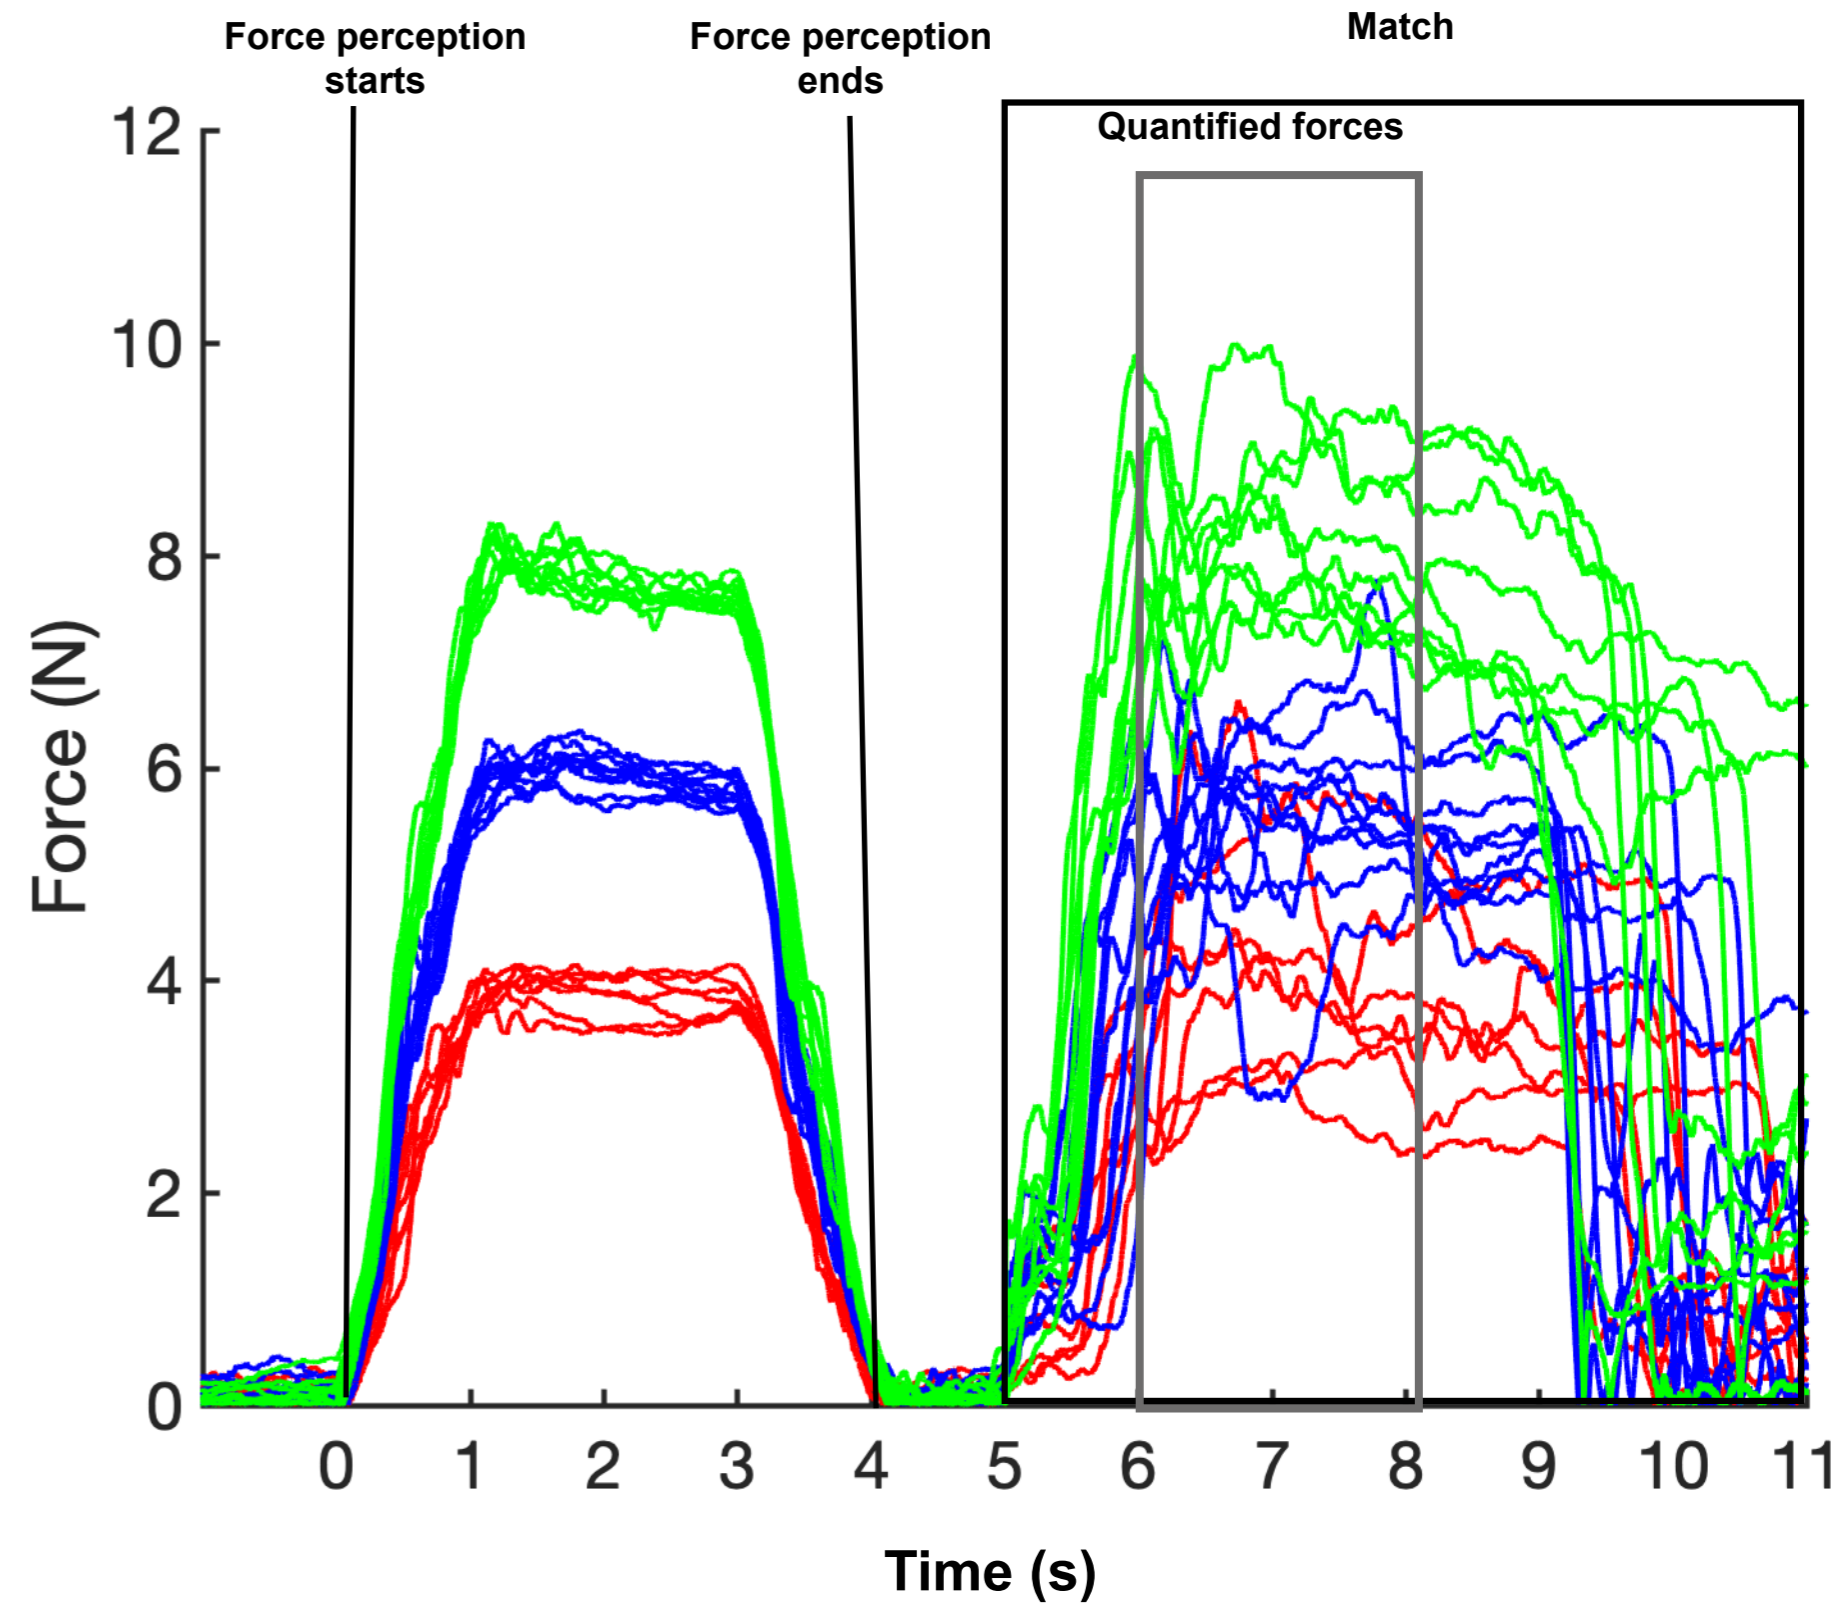

Fig 3.

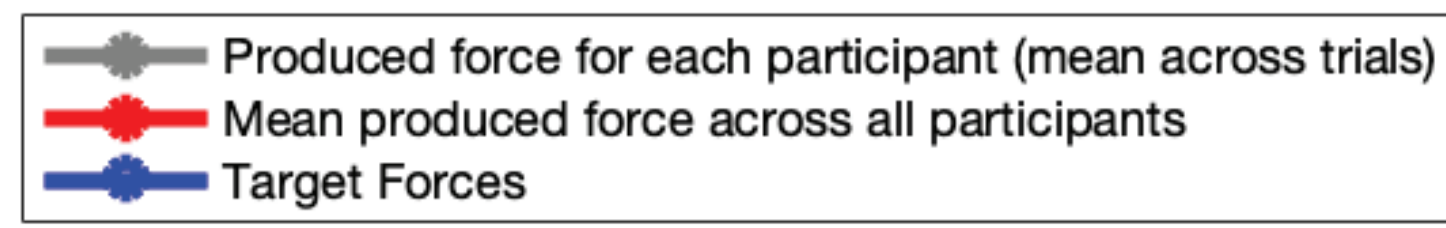

Slider condition

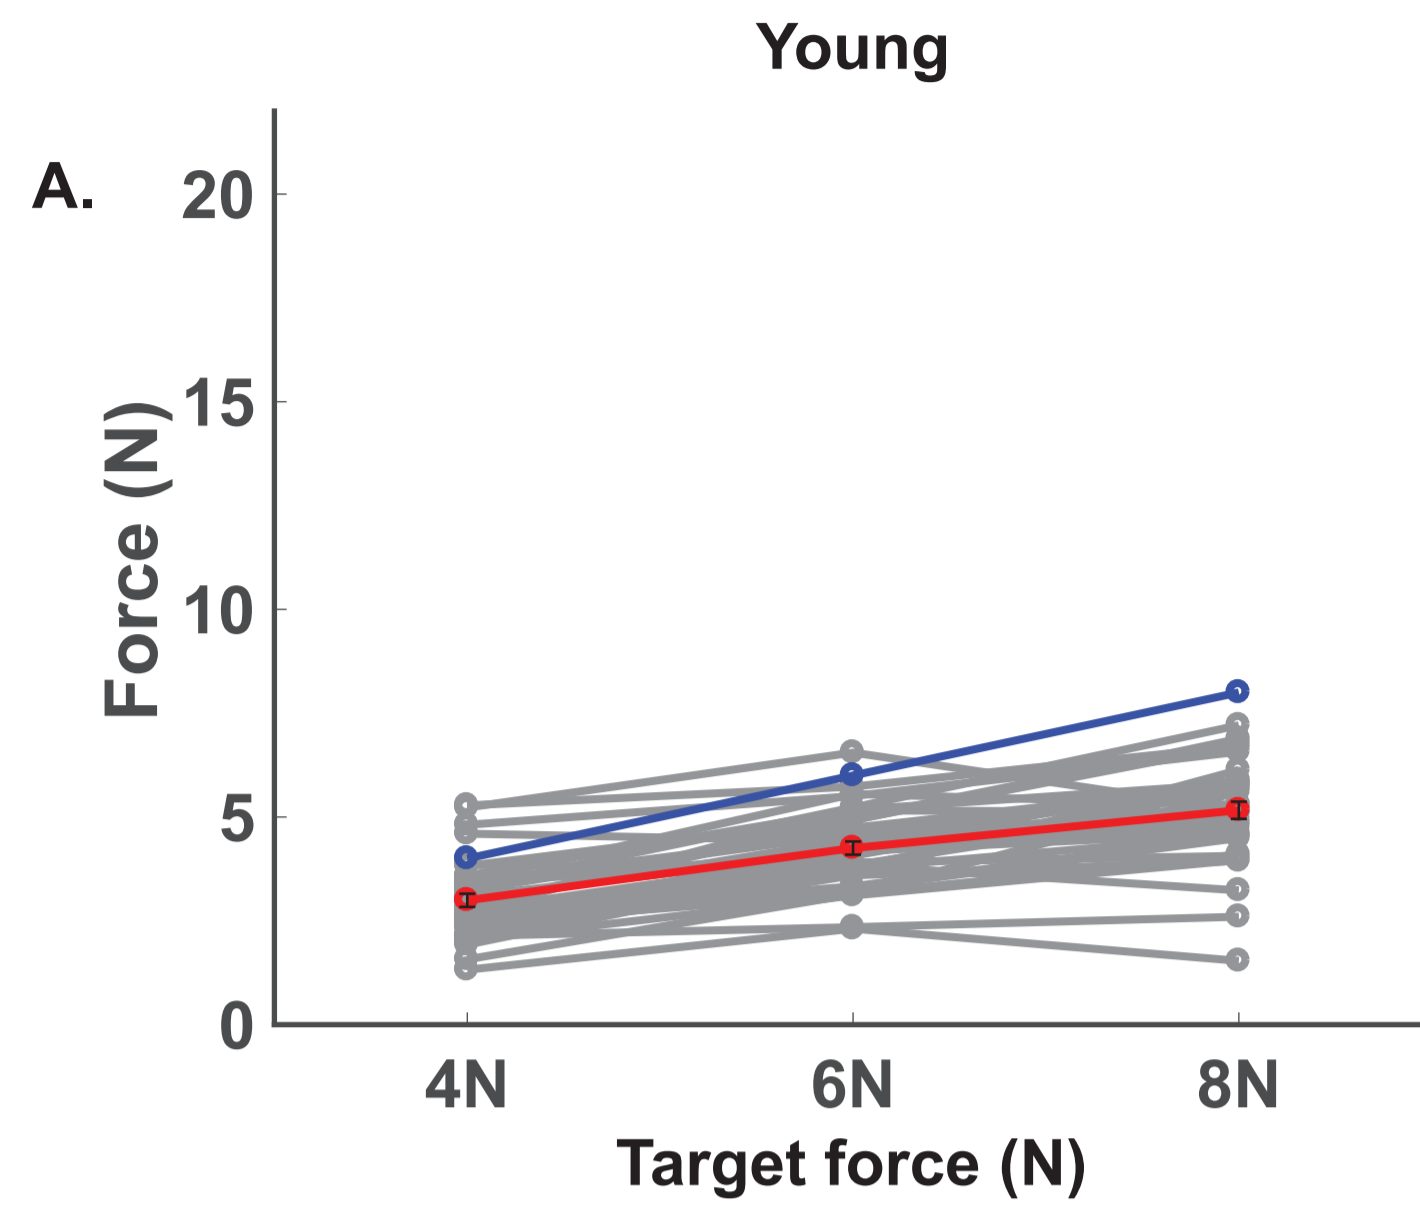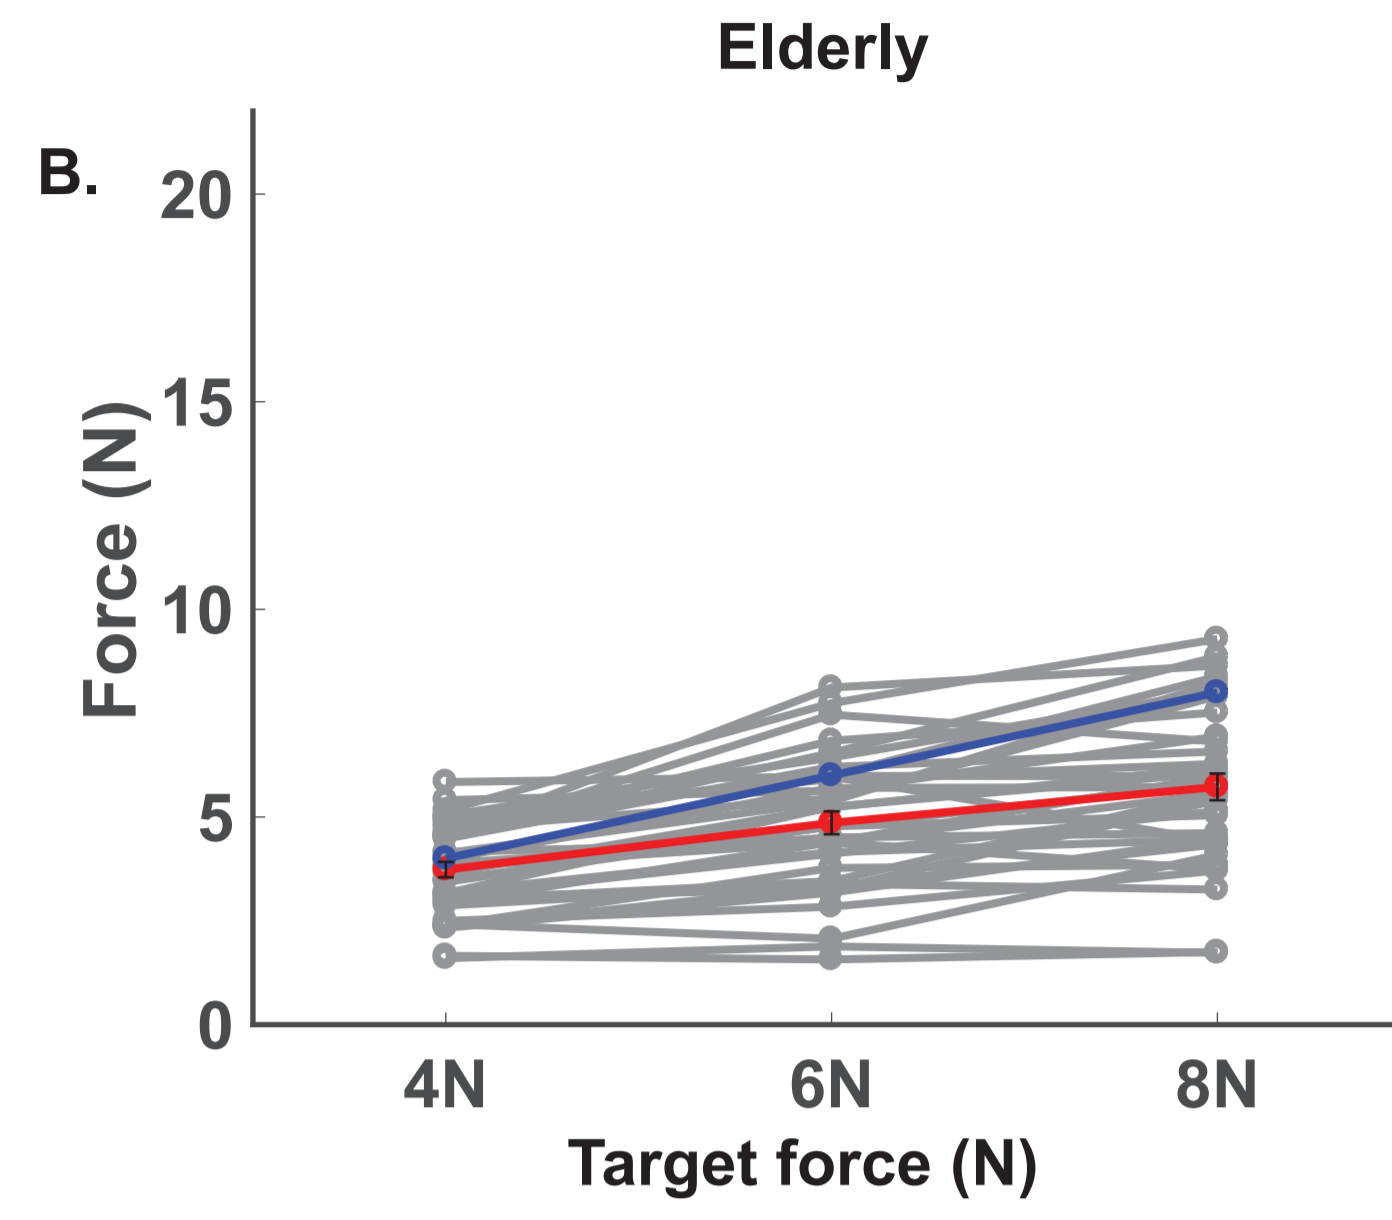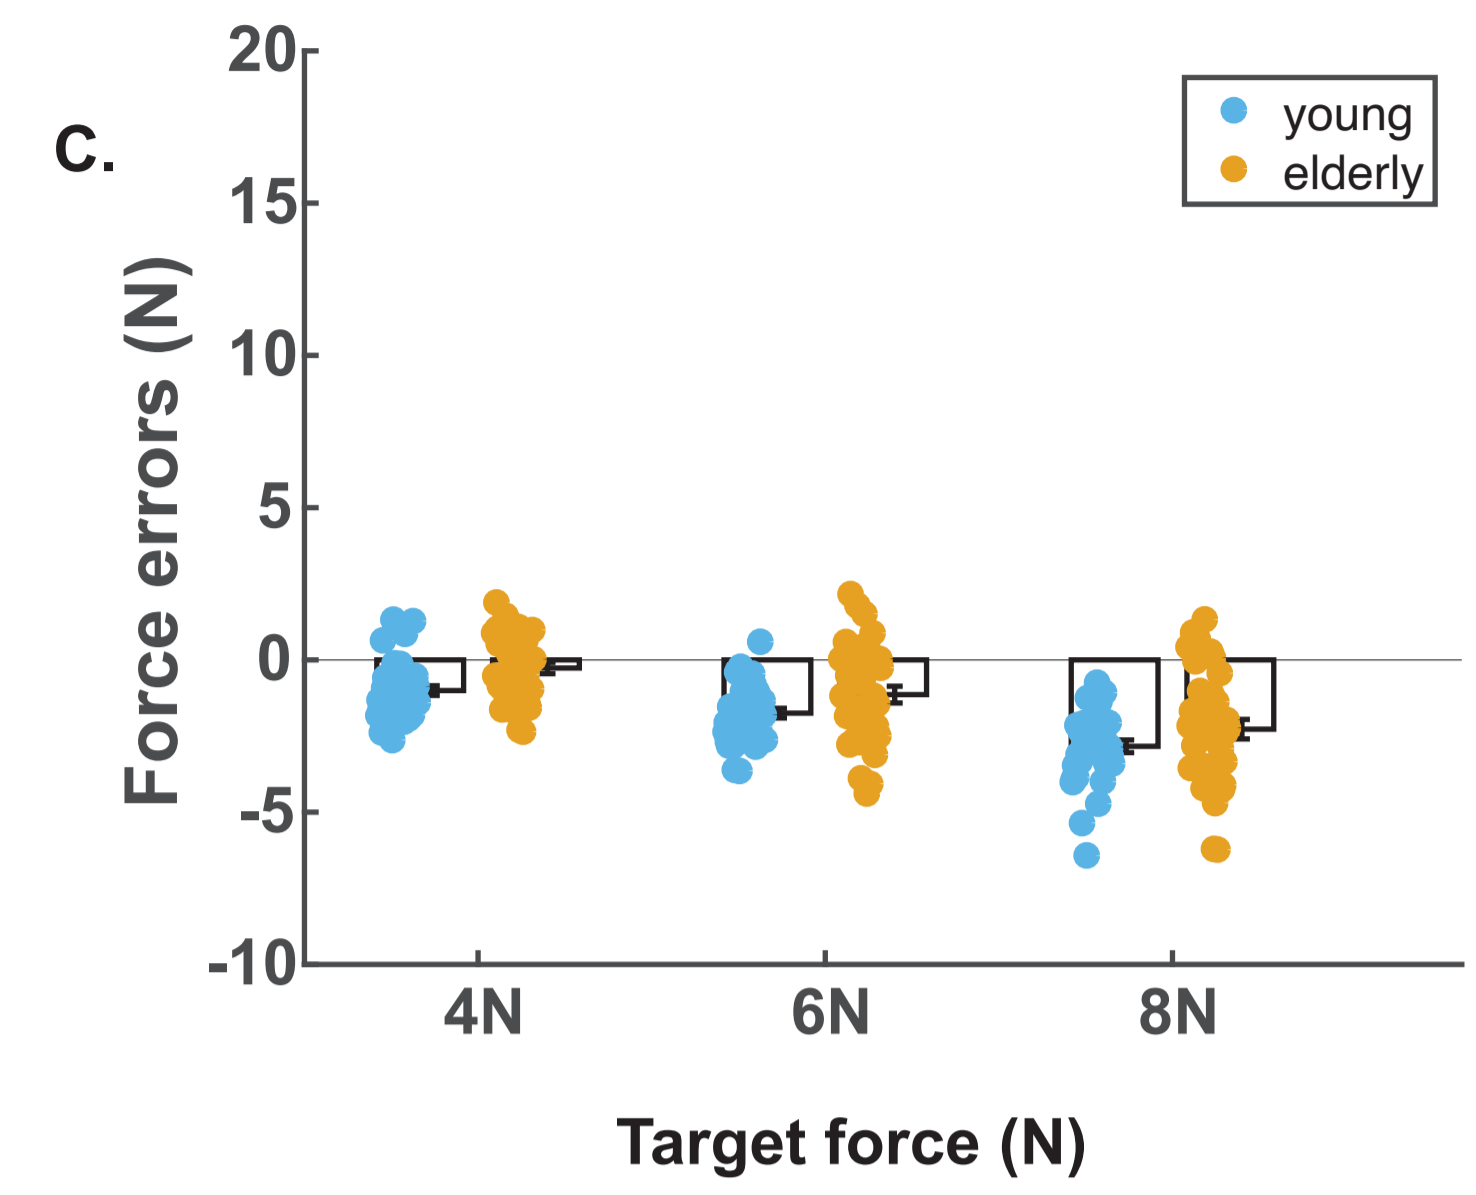

Mirror condition

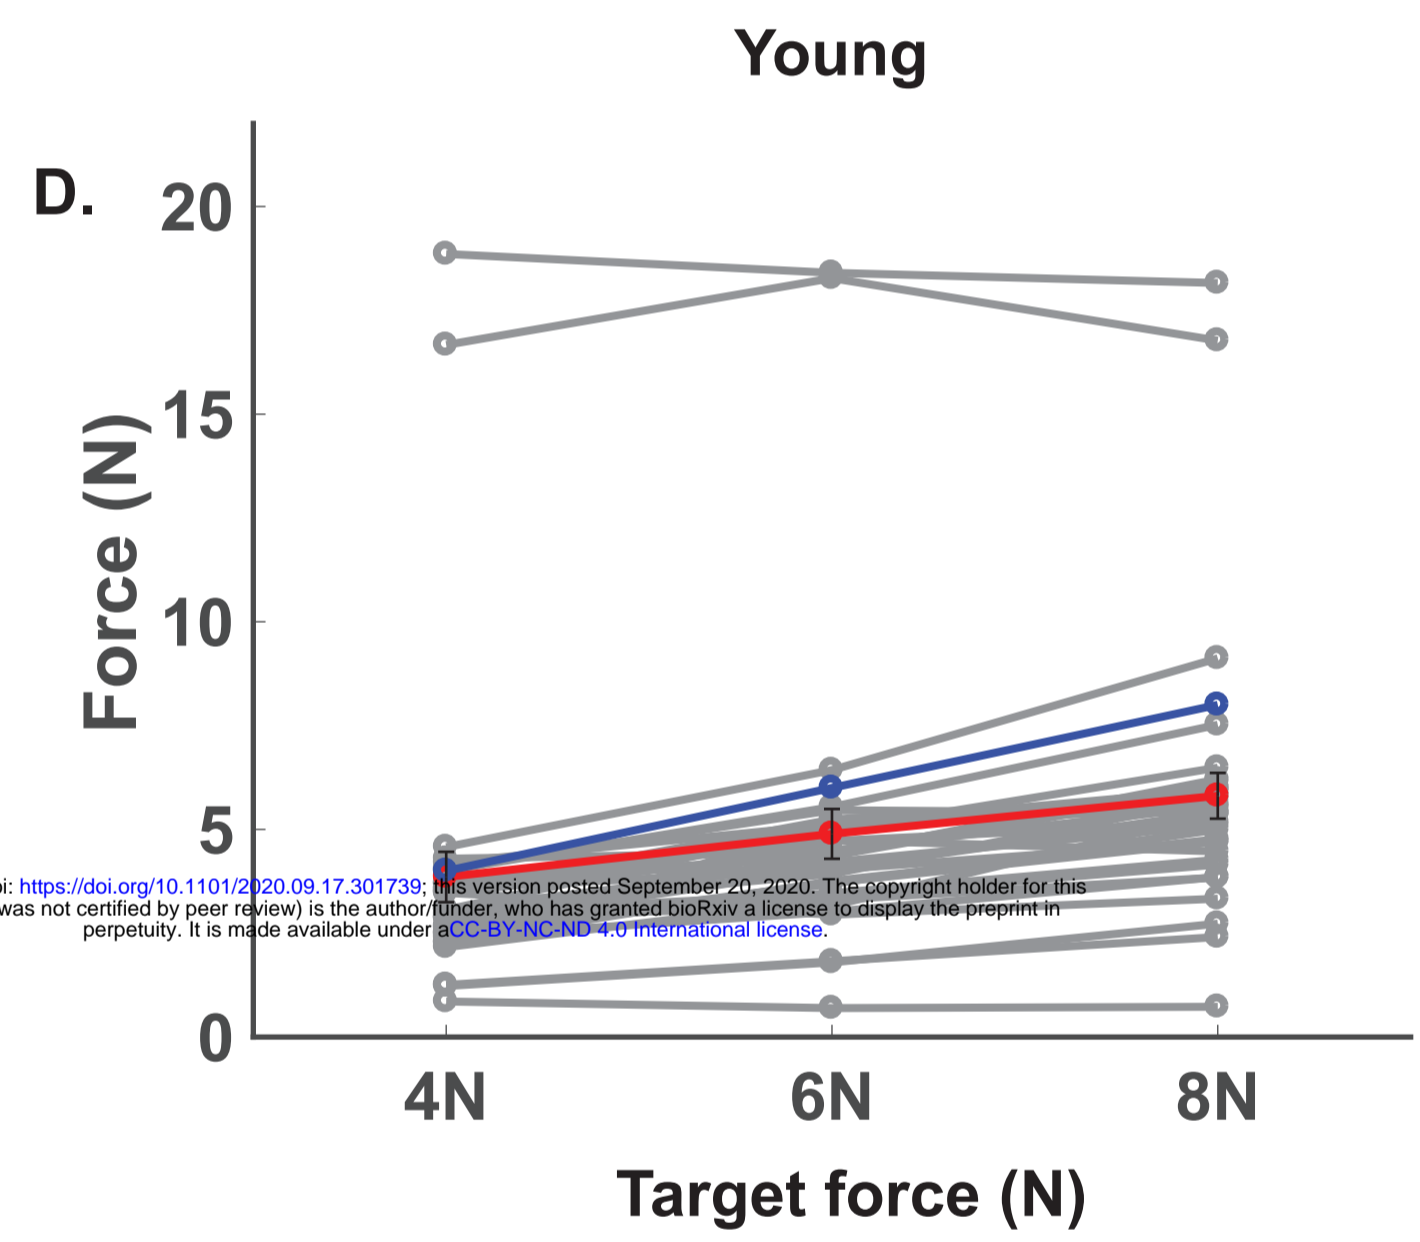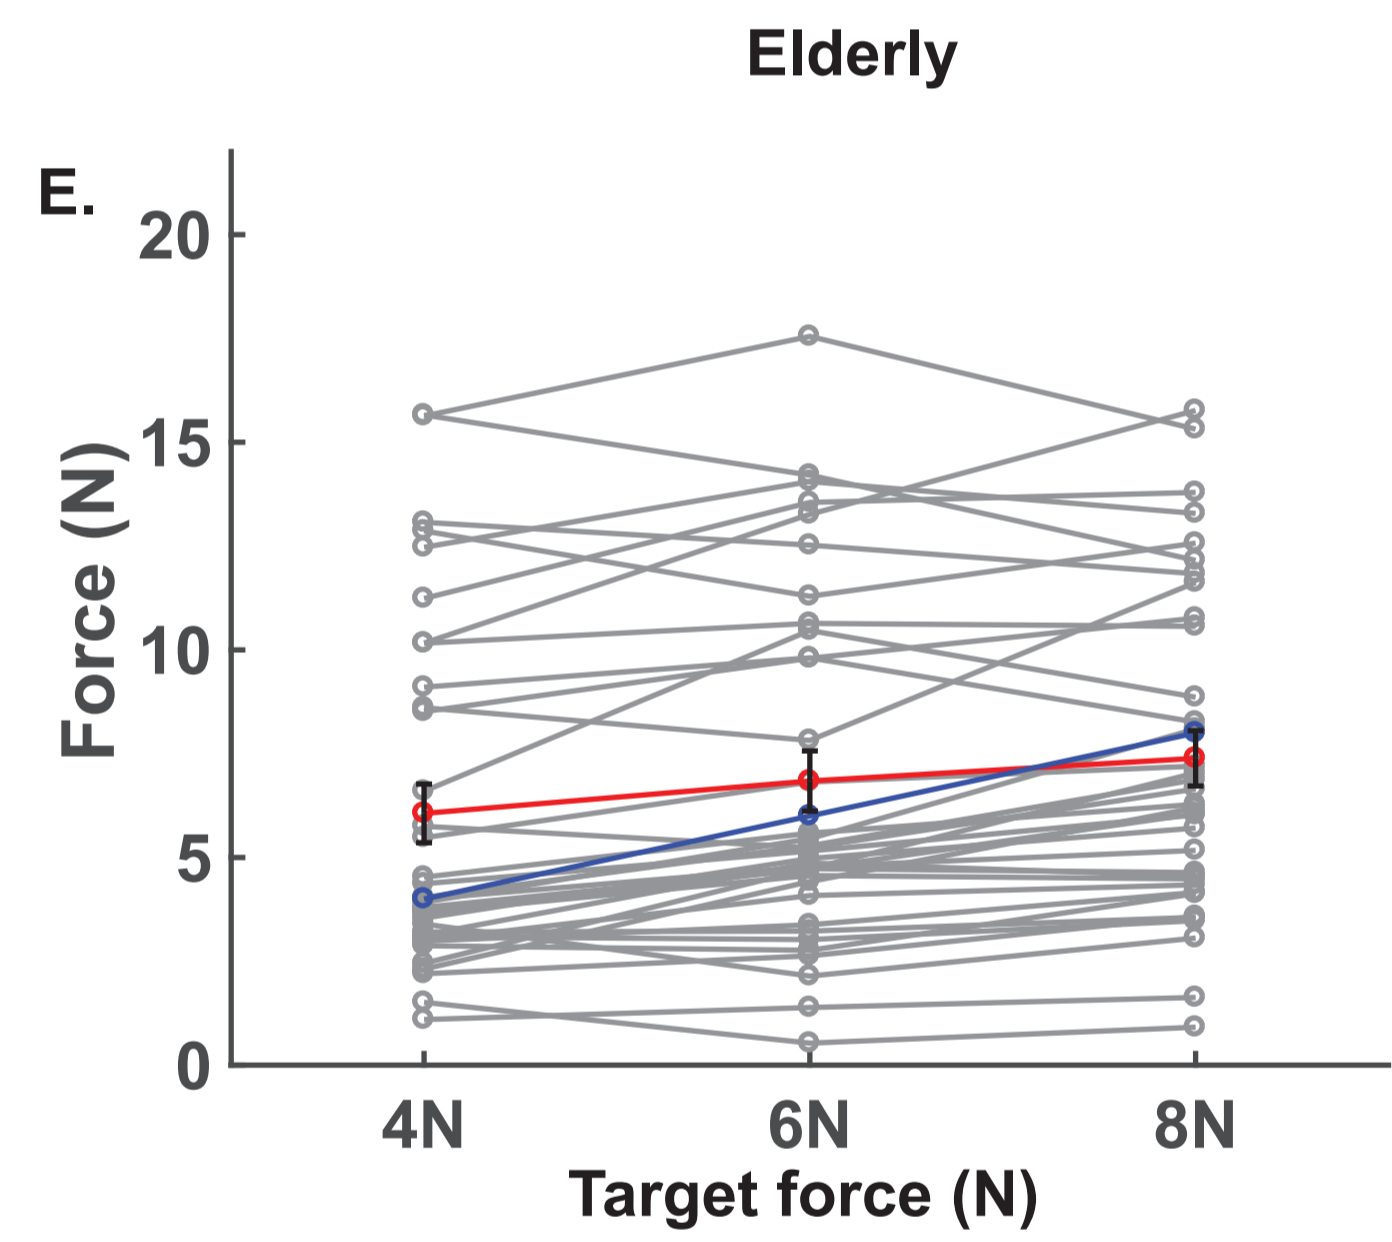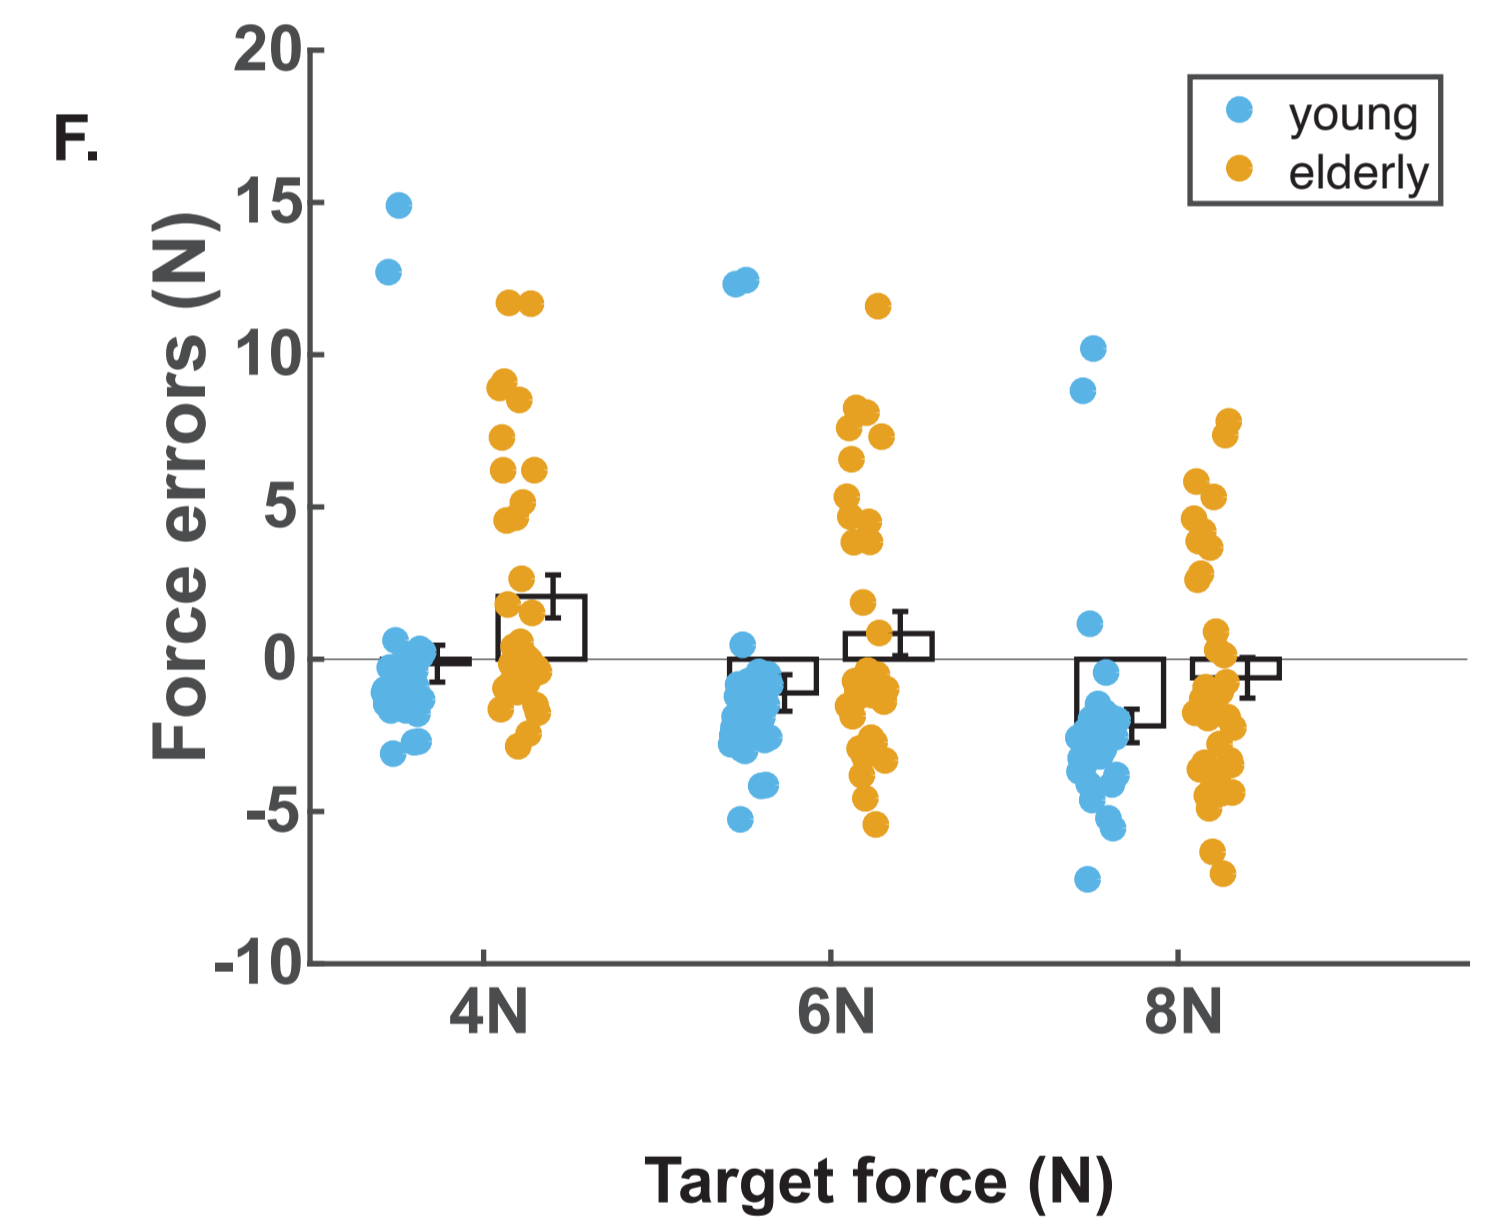

Parallel condition

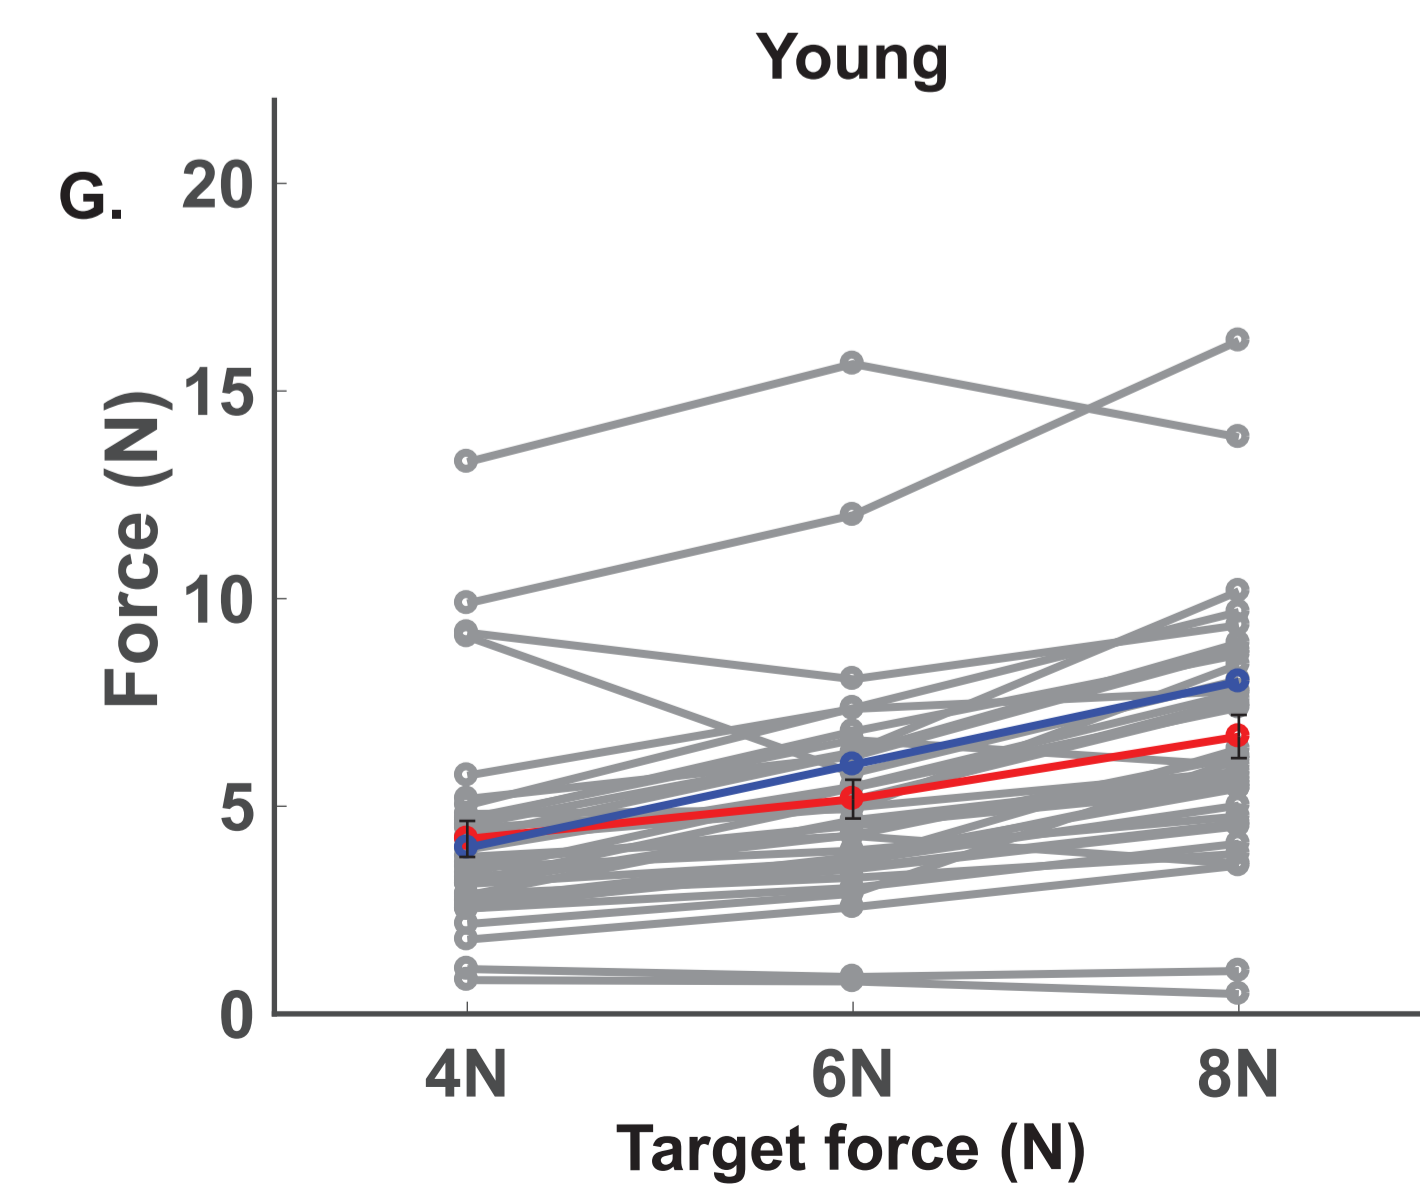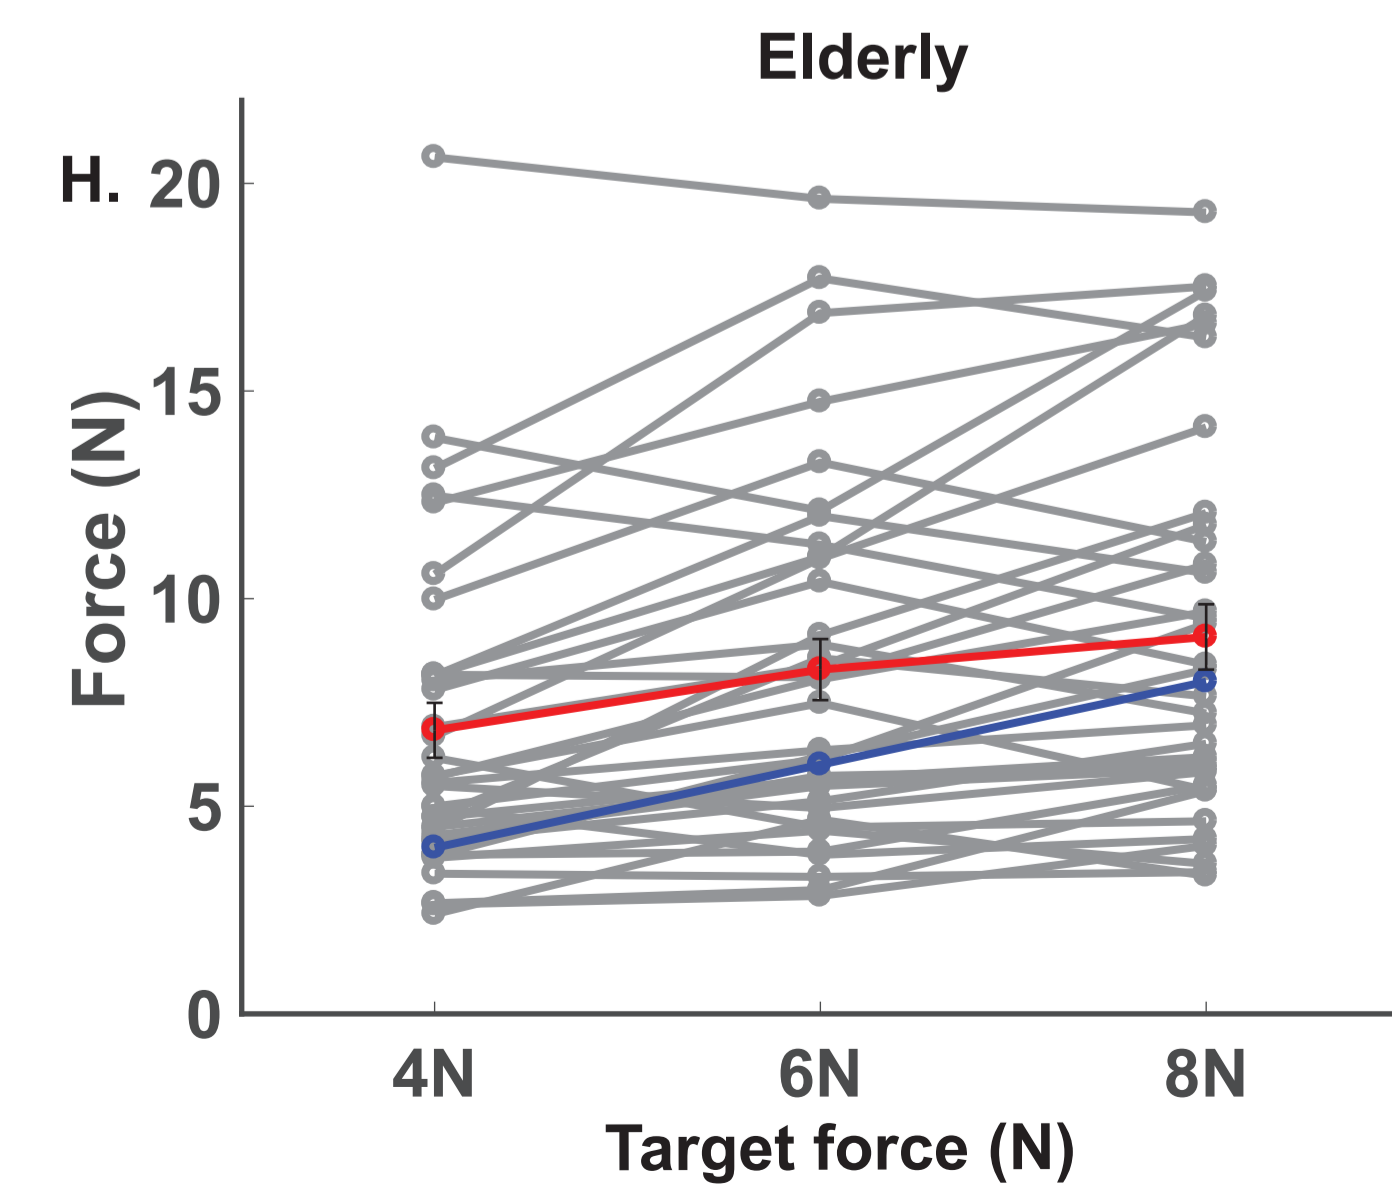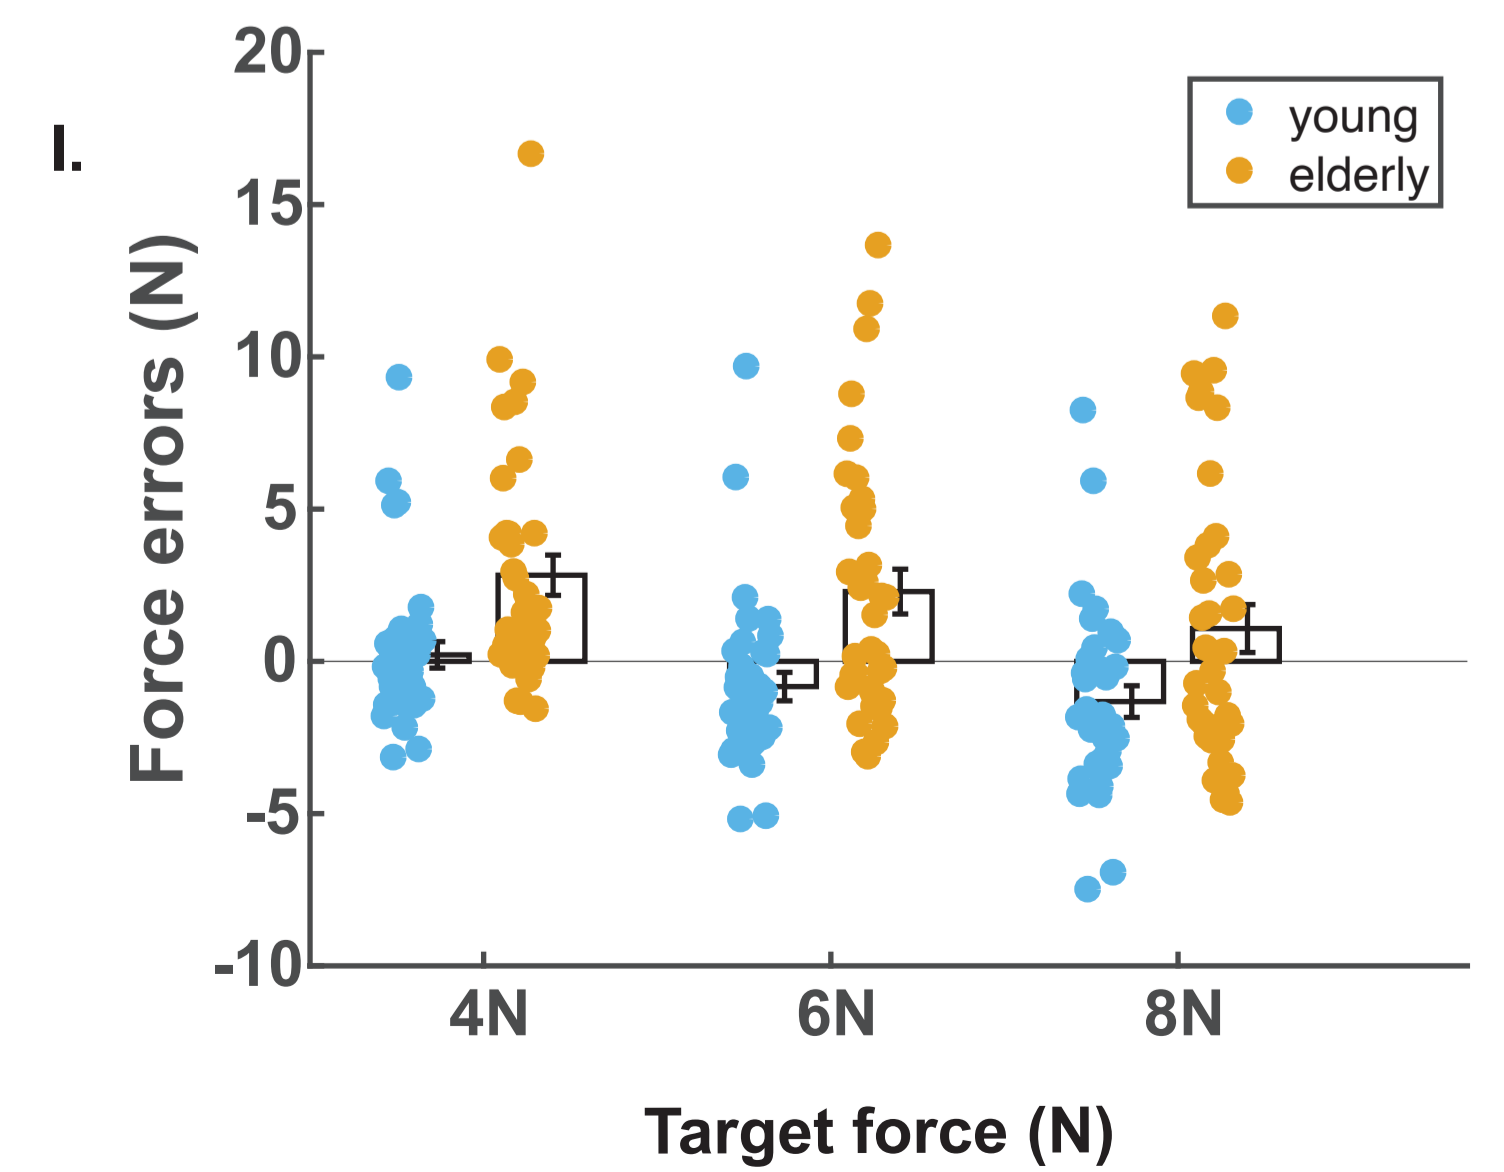



Fig 5.

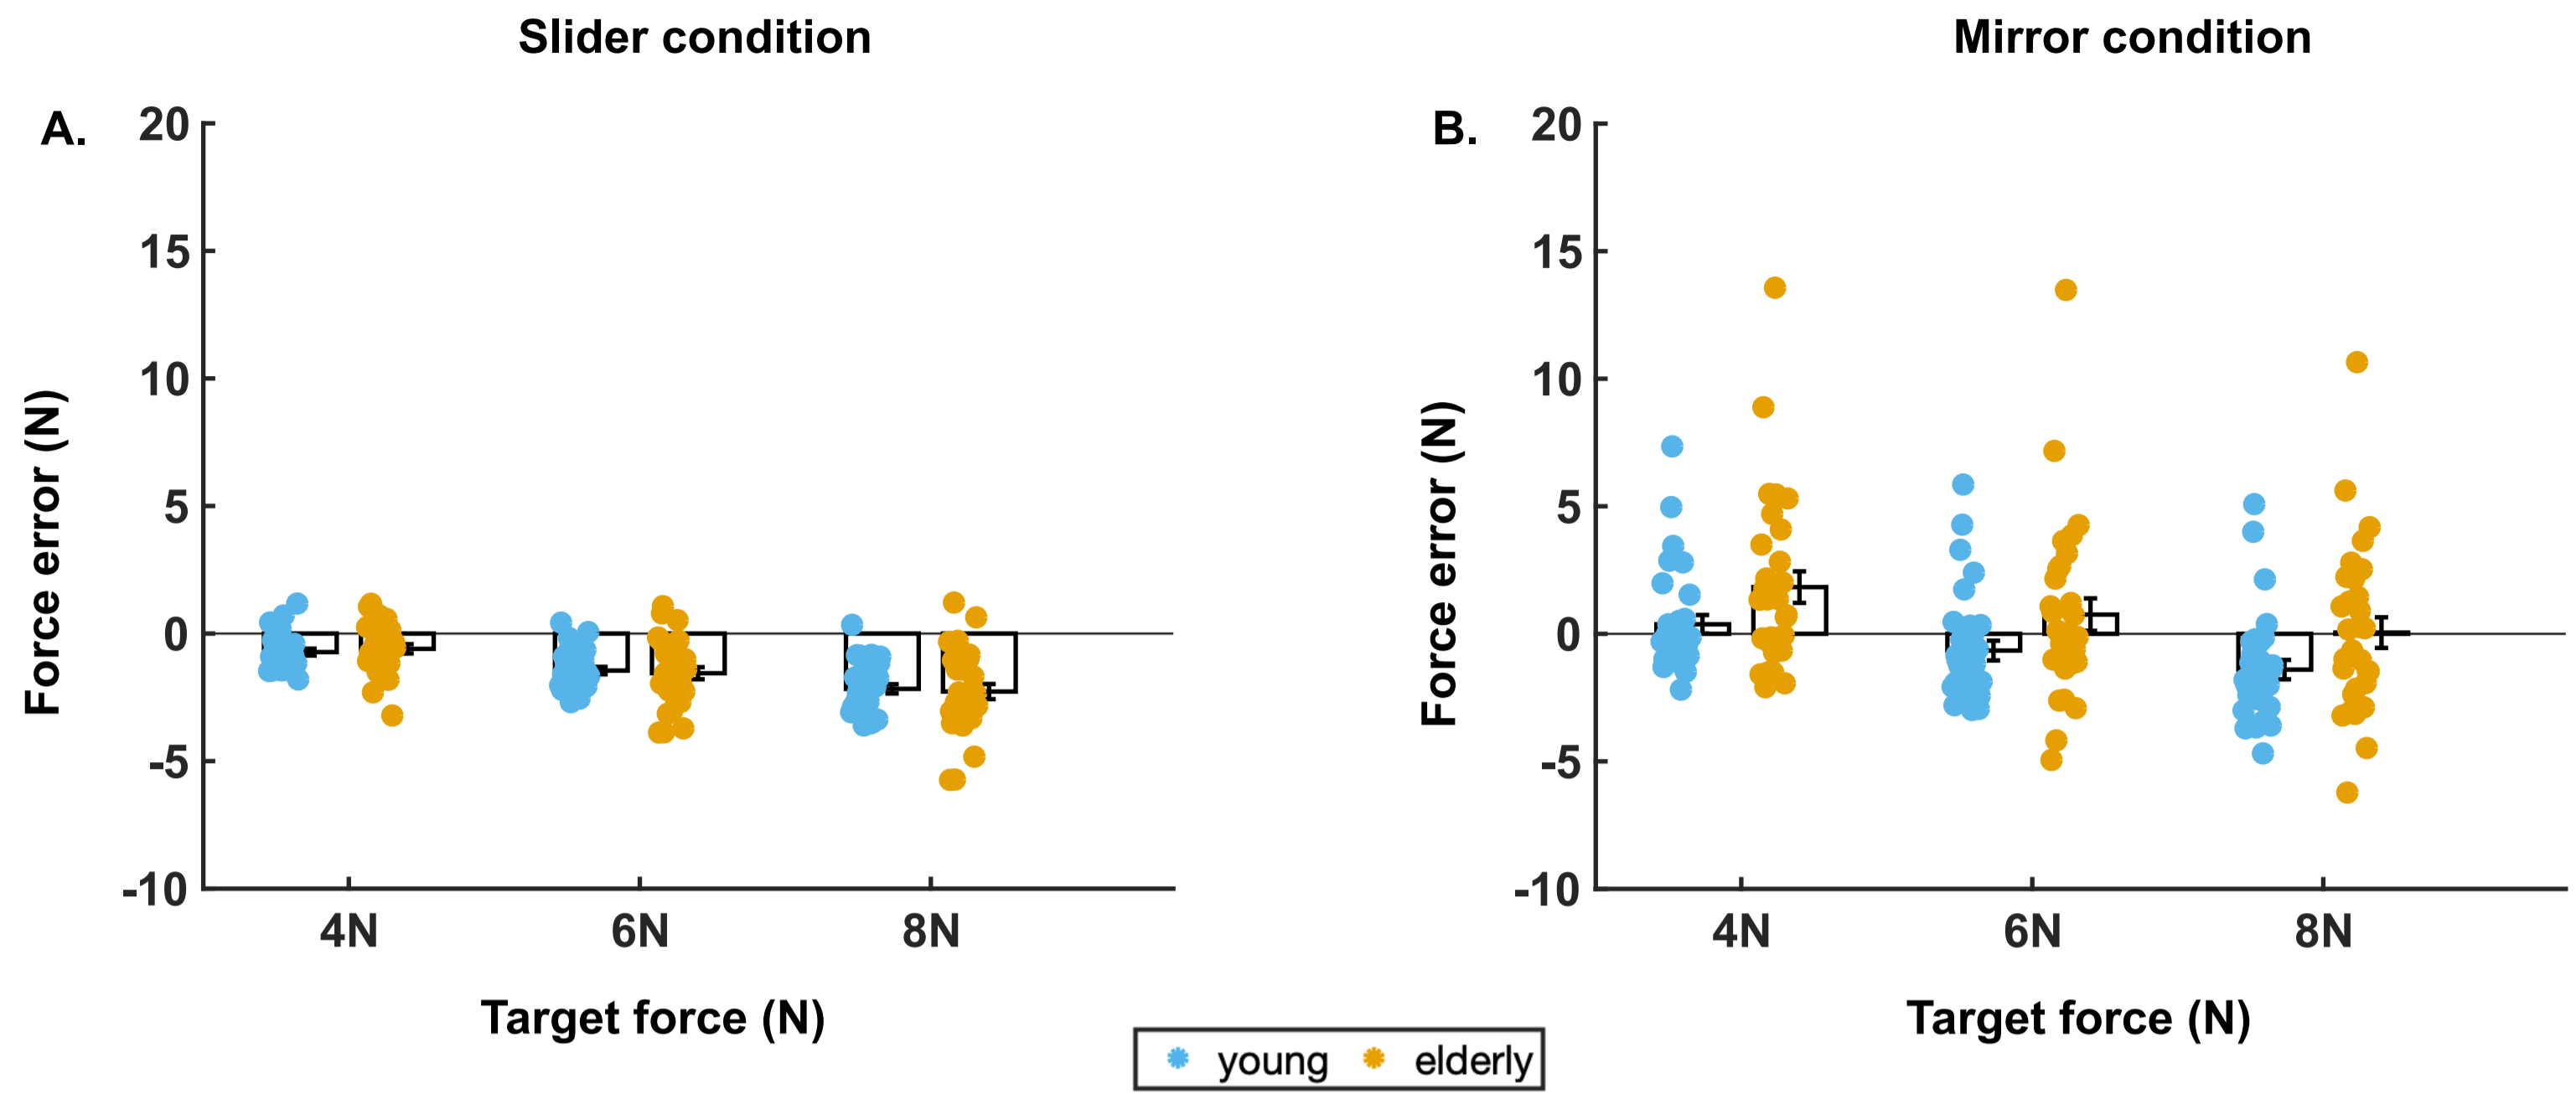

Fig 6.

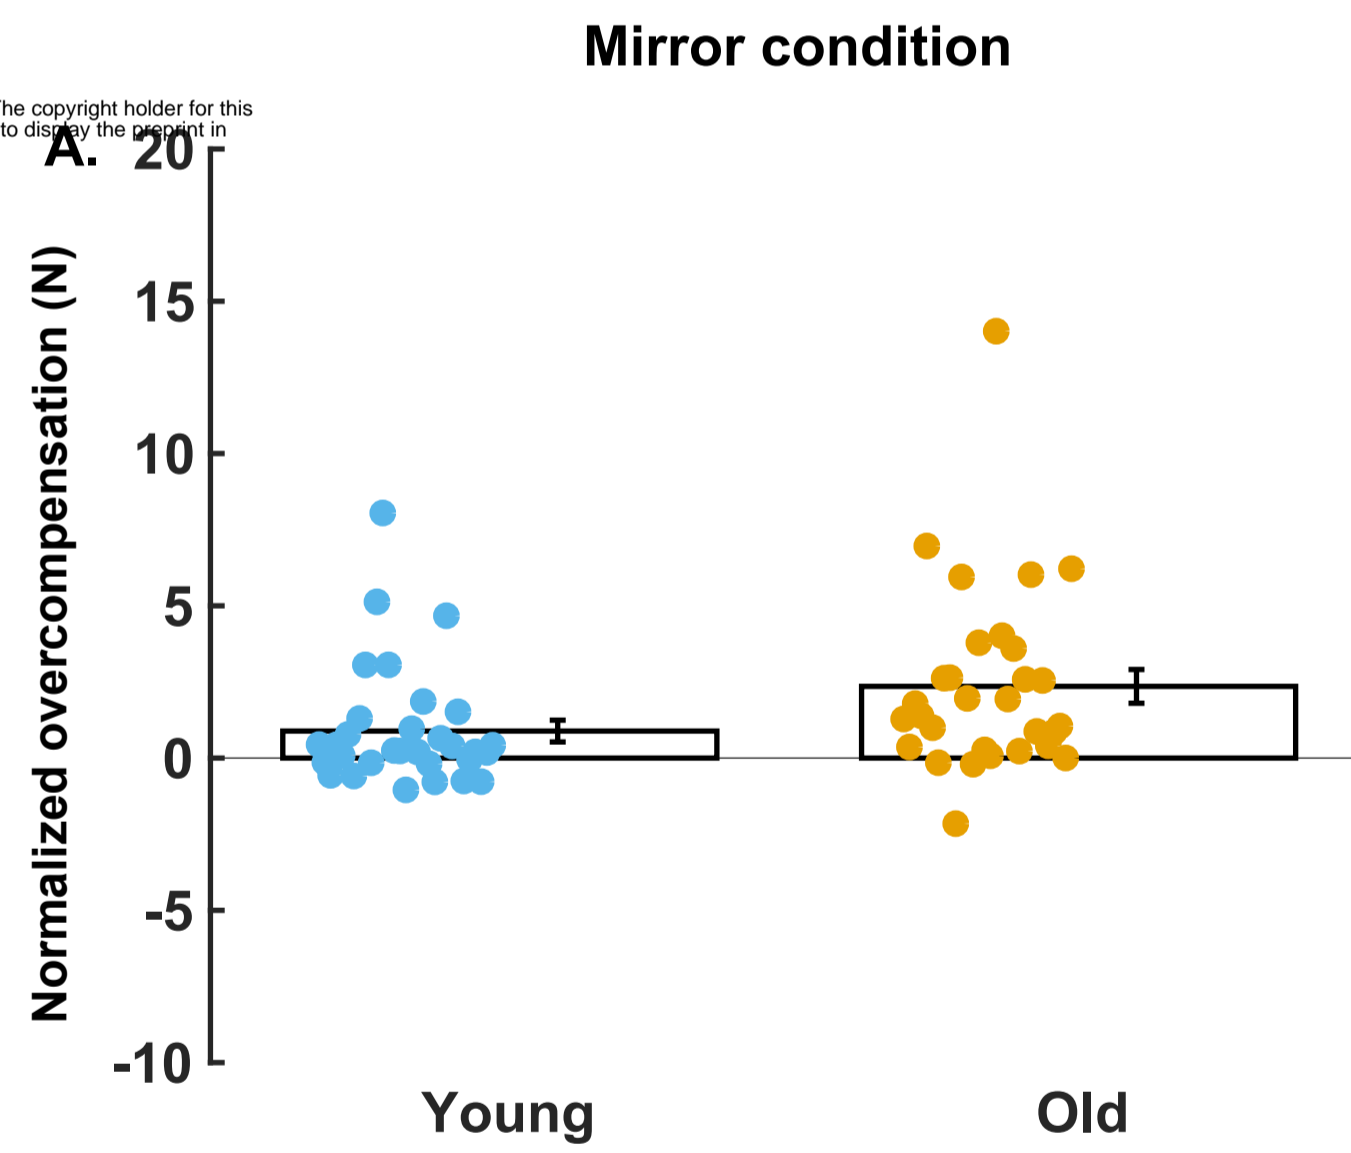

bioRxiv preprint doi: <https://doi.org/10.1101/2020.09.17.301739>; this version posted September 20, 2020. The copyright holder for this preprint (which was not certified by peer review) is the author/funder, who has granted bioRxiv a license to display the preprint in perpetuity. It is made available under aCC-BY-NC-ND 4.0 International license.

## 1 Figure Captions

2 **Fig 1: Experimental blocks of the study.** Panel A: A target force that pushed the left arm to  
3 the +X direction was presented for 2 seconds (force perception phase), with a ramp-up and  
4 ramp-down of 1 second each. Participants were asked to counteract this force and judge the  
5 level. The force perception phase was followed by a second phase (force reproduction phase)  
6 where the participants were asked to reproduce the force that they perceived on their left hand.  
7 This phase differed across the three possible experimental conditions (panels B, C and D). In  
8 the slider condition (panel B), participants matched the target force by moving the right arm up  
9 or down on a slider. The position of the hand/slider was mapped to a certain level of force and  
10 transmitted to and felt on the left arm. There were also two direct Conditions: Mirror (panel C)  
11 and Parallel (panel D). In the mirror condition (panel C), participants matched the target force  
12 by applying a force to the right handle using the right arm. This was transmitted and felt on the  
13 left arm in the +X direction as shown by the arrows. In the parallel condition (panel D),  
14 participants matched the target force by applying a force to the right handle using the right arm.  
15 This was transmitted and felt on the left arm in the -X direction as shown by the arrows.

16 **Fig 2. Force profile of one participant across all three levels of force and two conditions.**  
17 The force profile is represented for all trials from one participant across two different conditions  
18 (left panel: slider; right panel: mirror). Each color corresponds to a different target force (4, 6  
19 or 8 N) that was presented to the participant during the force perception phase. The X-axis  
20 represents the number of seconds since the start of the force perception period. The Y-axis  
21 shows the force measured by the force transducer of the left hand.

22 **Fig 3. Experiment 1: comparison of exerted forces and force errors of both age groups**  
23 **across the three conditions.** Each row corresponds to a different condition (top row: slider;  
24 middle row: mirror; bottom row: parallel). The average force exerted by the participants from  
25 the young (left column) and old group (middle column) is presented. The gray traces  
26 represented the average force for each individual participants. The red trace represents the group  
27 average. The blue trace corresponds to the target force. The X-axis shows the different force  
28 levels. Y-axis is the produced Forces (N). The third column present the average force errors  
29 (N=35/group) for both age groups and each force level. Black rectangle and error bars of 3C,  
30 3F and 3I represent the mean and standard error respectively. Each dot is the average of all  
31 trials for each force level and for each participant.

32 **Fig 4: Normalized Overcompensation (experiment 1). The average normalized**  
33 **overcompensation is presented for each age group (N=35/group) and each condition (panel**



34 A: mirror condition; panel B: parallel condition. Each dot is the average normalized  
35 overcompensation for each individual (collapsed across force levels). The black rectangle  
36 represents the average across all participants for each group separately. The error bar represents  
37 the standard error of the mean.

38 **Fig 5: Comparison of force error between age groups (experiment 2).** The average force  
39 errors (N=31 young, N=30 old) for both age groups and each force level for the slider condition  
40 (panel A) and mirror condition (panel B). Black rectangle and error bars represent the mean and  
41 standard error respectively. Each dot is the average across all trials for each force level and for  
42 each participant separately.

43 **Fig 6. Normalized Overcompensation (experiment 2). The average normalized**  
44 **overcompensation is presented for each age group** (N=31 young, N=30 old) in the mirror  
45 condition. Each dot represents the average normalized overcompensation for each individual  
46 (collapsed across force levels). The black rectangle represents the average across all participants  
47 for each group separately. The error bar represents the standard error of the mean.

48
